1

# 1 **Reconstructed ancient nitrogenases suggest Mo-specific ancestry**

2 Amanda K. Garcia<sup>1</sup>, Hanon McShea<sup>2,a</sup>, Bryan Kolaczkowski<sup>3</sup>, Betül Kaçar<sup>1,4</sup>

3

4 <sup>1</sup>Department of Molecular and Cellular Biology, University of Arizona, Tucson, Arizona

5 <sup>2</sup>Department of Organismic and Evolutionary Biology, Harvard University, Cambridge, Massachusetts

6 <sup>3</sup>Department of Microbiology and Cell Science, University of Florida, Gainesville, Florida

7 <sup>4</sup>Department of Astronomy and Steward Observatory, University of Arizona, Tucson, Arizona

8 <sup>a</sup>Present address: Department of Earth System Science, Stanford University, Stanford, California

9

## 10 **Corresponding author information:**

11 Betul Kacar

12 1007 E. Lowell St., Tucson, AZ 85721

13 betul@arizona.edu

14

## 15 **ABSTRACT**

16 The nitrogenase metalloenzyme family, essential for supplying fixed nitrogen to the biosphere, is  
17 one of life's key biogeochemical innovations. The three isozymes of nitrogenase differ in their  
18 metal dependence, each binding either a FeMo-, FeV-, or FeFe-cofactor for the reduction of  
19 nitrogen. The history of nitrogenase metal dependence has been of particular interest due to the  
20 possible implication that ancient marine metal availabilities have significantly constrained  
21 nitrogenase evolution over geologic time. Here, we combine phylogenetics and ancestral sequence  
22 reconstruction — a method by which inferred, historical protein sequence information can be  
23 linked to functional molecular properties — to reconstruct the metal dependence of ancient  
24 nitrogenases. Inferred ancestral nitrogenase sequences at the deepest nodes of the phylogeny

25 suggest that ancient nitrogenases were Mo-dependent. We find that active-site sequence identity  
26 can reliably distinguish extant Mo-nitrogenases from V- and Fe-nitrogenases, as opposed to  
27 modeled active-site structural features that cannot be used to reliably classify nitrogenases of  
28 unknown metal dependence. Taxa represented by early-branching nitrogenase lineages lack one  
29 or more biosynthetic *nifE* and *nifN* genes that are necessary for assembly of the FeMo-cofactor,  
30 suggesting that early Mo-dependent nitrogenases may have utilized an alternate pathway for Mo-  
31 usage predating the FeMo-cofactor. Our results underscore the profound impacts that protein-level  
32 innovations likely had on shaping global biogeochemical cycles throughout Precambrian, in  
33 contrast to organism-level innovations which characterize Phanerozoic eon.

34

35 **KEYWORDS**

36 ancestral sequence reconstruction, cofactor pocket, metalloenzyme, nitrogenase, nitrogen fixation

37

## 38 1 INTRODUCTION

39 All known life requires nitrogen for the synthesis of essential biomolecules, including nucleotides  
40 and amino acids. Though the atmosphere contains nearly 80% N<sub>2</sub> by volume, most organisms are  
41 not able to assimilate N<sub>2</sub> due to the enormous energetic cost of breaking the N≡N bond (MacKay  
42 & Fryzuk, 2004). Select bacteria and archaea called diazotrophs accomplish biological nitrogen  
43 fixation by nitrogenase metalloenzymes (E.C. 1.18.6.1), which catalyze the reduction of N<sub>2</sub> to  
44 bioavailable NH<sub>3</sub>. Nitrogenases are an ancient family of enzymes; oldest isotopic biosignatures  
45 interpreted as evidence of nitrogenase activity date to ~3.2 billion years (Ga) (Stueken, Buick,  
46 Guy, & Koehler, 2015). Because nitrogen has been suggested to be an important limiting nutrient  
47 on geologic timescales (Falkowski, 1997), nitrogenases have likely played a key role in the  
48 expansion of the biosphere since the Archean.

49  
50 The nitrogenase family consists of three homologous isozymes (Boyd, Hamilton, & Peters, 2011;  
51 Raymond, Siefert, Staples, & Blankenship, 2004) named for the differential metal content of the  
52 active-site cofactor: Mo-nitrogenase (Nif, encoded by *nif*), V-nitrogenase (Vnf, encoded by *vnf*),  
53 and Fe-nitrogenase (Anf, encoded by *anf*) (Bulen & LeComte, 1966; Eady, 1996; Joerger &  
54 Bishop, 1988; Mus, Alleman, Pence, Seefeldt, & Peters, 2018) (**Figure 1**). Of the three isozymes,  
55 Mo-nitrogenases are the most common and widely studied; V- and Fe-nitrogenases are  
56 comparatively rarer and only known in taxa that also possess Mo-nitrogenase (Boyd, Hamilton, et  
57 al., 2011; Dos Santos, Fang, Mason, Setubal, & Dixon, 2012). All three nitrogenase isozymes are  
58 structurally and functionally similar, each containing two protein components: the electron  
59 delivery component (NifH, VnfH, or AnfH) is a homodimer and the catalytic component is either  
60 an  $\alpha_2\beta_2$  heterotetramer (MoFe protein, NifDK) or an  $\alpha_2\beta_2\gamma_2$  heterohexamer (VFe protein, VnfDGK

61 or FeFe protein, AnfDGK) (**Figure 1a**) (Bulen & LeComte, 1966; Hales, Case, Morningstar,  
62 Dzeda, & Mauterer, 1986; Schmid et al., 2002; D. Sippel & Einsle, 2017). During catalysis, the  
63 electron delivery component transiently associates with and delivers electrons to the catalytic  
64 component (Hageman & Burris, 1978). Electrons accumulate at the active site for N<sub>2</sub> binding and  
65 reduction (Hoffman, Lukoyanov, Yang, Dean, & Seefeldt, 2014), which houses a homocitrate-  
66 metallocluster cofactor unique to each isozyme: the FeMo-cofactor in Nif (**Figure 1b**), FeV-  
67 cofactor in Vnf (**Figure 1c**), and FeFe-cofactor in Anf (**Figure 1d**) (Eady, 1996; Harris,  
68 Lukoyanov, et al., 2018; Krahn et al., 2002; Mus et al., 2018; D. Sippel & Einsle, 2017; Spatzal et  
69 al., 2011) Available spectral evidence suggest that these cofactors are structurally similar except  
70 for the substitution of a Mo, V, or additional Fe atom (Eady, 1996; Krahn et al., 2002; Daniel  
71 Sippel et al., 2018; Spatzal et al., 2011). Nevertheless, biochemical studies demonstrate variable  
72 catalytic properties among the three nitrogenase isozymes, including differential abilities to reduce  
73 alternative substrates (Harris, Lukoyanov, et al., 2018; Harris, Yang, Dean, Seefeldt, & Hoffman,  
74 2018; B. Hu et al., 2018; Y. Hu, Lee, & Ribbe, 2011; Zheng et al., 2018). These catalytic variations  
75 likely arise due to a combination of the aforementioned cofactor compositional differences as well  
76 as differences in the surrounding protein environment (Fixen et al., 2016; Harris, Yang, et al.,  
77 2018; Lee et al., 2018; Rebelein, Lee, Newcomb, Hu, & Ribbe, 2018; Zheng et al., 2018).

78

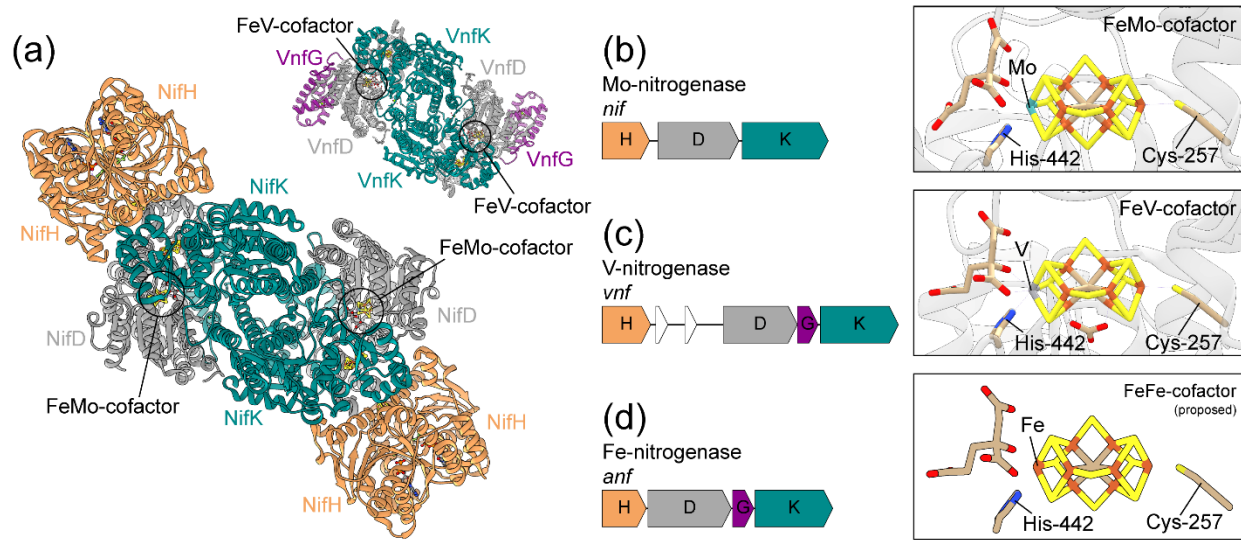

79

80 **Figure 1.** Structure and genetics of the three nitrogenase isozymes. (a) Structure of the *A.*  
 81 *vinelandii* Mo-nitrogenase enzyme complex (NifHDK; PDB 1M34 (Schmid et al., 2002)) and V-  
 82 nitrogenase VFe-protein component (VnfDGK; PDB 5N6Y (D. Sippel & Einsle, 2017)) (Fe-  
 83 nitrogenase structure not previously published). The active-site FeMo-cofactor of Mo-nitrogenase  
 84 and FeV-cofactor of V-nitrogenase are circled. (b-d) Catalytic genes and cofactor structures of *A.*  
 85 *vinelandii* Mo-nitrogenase (b; PDB 3U7Q (Spatzal et al., 2011)), V-nitrogenase (c; PDB 5N6Y  
 86 (D. Sippel & Einsle, 2017)), and Fe-nitrogenase (d; proposed structure (Harris, Lukoyanov, et al.,  
 87 2018)). Cofactor atom coloring is as follows: C, tan; Fe, rust; Mo, cyan; N, blue; O, red; S, yellow.  
 88  
 89 Metal cofactor incorporation in nitrogenases is constrained at multiple levels. At the level of single  
 90 enzyme functionality, nitrogenase biochemical and biophysical properties shape metal binding  
 91 specificity. At a higher level, constraints arise from the partner proteins that constitute the  
 92 biosynthetic mechanism for active-site cofactor assembly and insertion, best studied in Mo-  
 93 nitrogenases (Curatti et al., 2007; Y. Hu & Ribbe, 2011; Rubio & Ludden, 2008). In the  
 94 *Azotobacter vinelandii* (*A. vinelandii*) model system, FeMo-cofactor assembly requires several

95 associated proteins encoded within the *nif* gene cluster (Curatti et al., 2007; Dos Santos et al.,  
96 2012; Shah, Allen, Spangler, & Ludden, 1994; Shah, Imperial, Ugalde, Ludden, & Brill, 1986; St  
97 John et al., 1975; Tal, Chun, Gavini, & Burgess, 1991). Most notably, the biosynthetic *nifB*, *nifE*,  
98 and *nifN* genes have been demonstrated, in addition to the catalytic *nifHDK* genes, to be — perhaps  
99 minimally — required for FeMo-cofactor assembly and Mo-nitrogenase function (Curatti et al.,  
100 2007; Dos Santos et al., 2012; Shah et al., 1994; Shah et al., 1986; St John et al., 1975; Tal et al.,  
101 1991). In *A. vinelandii*, *nifE* and *nifN* loci are located just downstream of the *nifHDK* cluster,  
102 whereas the *nifB* locus is located within a separate *nif* region near other regulatory and biosynthetic  
103 *nif* genes (Setubal et al., 2009). NifB catalyzes the formation of a Fe-S-C metallocluster, a  
104 precursor that forms the core of the mature FeMo-cofactor (Allen, Chatterjee, Ludden, & Shah,  
105 1995; Y. Hu & Ribbe, 2011; St John et al., 1975). This precursor metallocluster is then transferred  
106 to a protein heterotetramer composed of NifE and NifN subunits (Allen et al., 1995; Roll, Shah,  
107 Dean, & Roberts, 1995), homologous to NifD and NifK, respectively, and likely having arisen by  
108 gene duplication (Boyd, Anbar, et al., 2011). Within NifEN, the precursor is further modified via  
109 the addition of homocitrate and Mo, and the mature cofactor is subsequently transferred to the  
110 nitrogenase NifDK catalytic protein component (Roll et al., 1995). Unlike that for the FeMo-  
111 cofactor, the biosynthetic pathways for the formation of the FeV- and FeFe-cofactors are relatively  
112 unknown. However, transcriptional profiling of the three nitrogenase systems in *A. vinelandii*  
113 suggests that FeV- and FeFe-cofactor synthesis relies on several *nif* genes in addition to *vnf* and  
114 *anf* genes, respectively (Hamilton et al., 2011; Joerger & Bishop, 1988; Kennedy & Dean, 1992).  
115 These include *nifBEN*, with the exception of certain taxa (including *A. vinelandii*) that possess  
116 *vnfEN* homologs of *nifEN* that likely perform a similar biosynthetic function (Boyd, Anbar, et al.,  
117 2011; Hamilton et al., 2011).

118  
119 Paleobiological interest in nitrogenases has primarily centered on the coevolution of nitrogenase  
120 metal usage and the geochemical environment, with the possible implication that marine metal  
121 availabilities have significantly constrained nitrogenase evolution over geologic time (Anbar &  
122 Knoll, 2002; Boyd, Hamilton, et al., 2011; Canfield, Glazer, & Falkowski, 2010; Raymond et al.,  
123 2004). Inferences of ancient nitrogenase metal usage have relied on isotopic biosignatures  
124 (Stueken et al., 2015) and metal abundances (Anbar & Knoll, 2002) evidenced by the geologic  
125 record, as well as on phylogenetic reconstructions of both catalytic and cofactor biosynthesis  
126 proteins (Boyd, Anbar, et al., 2011; Boyd, Hamilton, et al., 2011; Raymond et al., 2004). High  
127 marine Fe concentrations and potential Mo scarcity prior to increased atmospheric oxygenation  
128 surrounding the ~2.3-2.5 Ga Great Oxidation Event (Anbar et al., 2007; Lyons, Reinhard, &  
129 Planavsky, 2014) has led to the hypothesis that Fe- or V- nitrogenases may have been dominant in  
130 early oceans (Anbar & Knoll, 2002; Canfield et al., 2010) and possibly predate Mo-nitrogenases  
131 (Raymond et al., 2004). More recent phylogenetic reconstructions have instead suggested that the  
132 evolution of Mo-nitrogenases, dated by time-calibrated phylogenies of Nif/Vnf/AnfDKEN  
133 sequences to ~1.5–2.2 Ga (Boyd, Anbar, et al., 2011), preceded that of V- and Fe-nitrogenases  
134 (Boyd, Hamilton, et al., 2011). These phylogenetic inferences are also consistent with the  
135 observation that *vnf* and *anf* genes are only present in organisms that also harbor *nif*, and that V-  
136 /Fe-nitrogenase assembly relies on *nif* biosynthetic genes (Hamilton et al., 2011; Joerger & Bishop,  
137 1988; Kennedy & Dean, 1992). However, ~3.2-Ga isotopic signatures of biological nitrogen  
138 fixation suggest an earlier origin of nitrogenase (Stueken et al., 2015), and, even though  
139 isotopically consistent with Mo-dependent N-fixation, predate age estimates of both Mo-  
140 nitrogenase (Boyd, Anbar, et al., 2011) and earliest marine Mo availability (Anbar et al., 2007;

141 Anbar & Knoll, 2002; Lyons et al., 2014). Thus, the evolutionary trajectory of nitrogenase metal  
142 usage — and by extension the link between nitrogenase evolution and marine metal availabilities  
143 over geologic time — is not yet known.

144  
145 Here, we explored the indicators of nitrogenase metal usage history by a combinatorial method  
146 relying on ancestral sequence reconstruction, a method by which inferred, historical protein  
147 sequence information can be linked to functional molecular properties evidenced by computed  
148 structures or laboratory experiments (Aadland, Pugh, & Kolaczowski, 2019; Benner, Sassi, &  
149 Gaucher, 2007; Thornton, 2004). These paleogenetic approaches have been increasingly applied  
150 in biogeochemically relevant molecular studies to offer insights into the coevolution of life and  
151 Earth (Garcia & Kacar, 2019; Gomez-Fernandez et al., 2018; Kacar, Hanson-Smith, Adam, &  
152 Boekelheide, 2017; Shih et al., 2016). We reconstructed the phylogenetic history of Mo-, V-, and  
153 Fe-nitrogenases in order to resurrect ancestral nitrogenases *in silico*, as well as to map the  
154 taxonomic distribution of cofactor biosynthetic components considered necessary for Mo-  
155 dependence (Curatti et al., 2007; Shah et al., 1994; Shah et al., 1986; St John et al., 1975; Tal et  
156 al., 1991). By this combined approach, we find phylogenetic and ancestral sequence features  
157 suggestive of Mo-dependence, potentially by an alternate pathway predating the origin of the  
158 FeMo-cofactor. We speculate that this unknown and possibly transient pathway may today be  
159 present in basal nitrogenase lineages. Integration of protein evolution and paleobiology is a unique  
160 melding of disparate data sets and may allow construct-and-build hypotheses that address  
161 interactions ranging from the external environment to the cellular environment, and from the  
162 cellular environment to the that maintained around the interacting protein. The exchange of  
163 materials across these different scales necessitates constraints on the flow and availability of



164 substrates that make such exchanges possible. It is the specific nature of these constraints and how  
165 they may change in response to external perturbations that enable us to develop completely new  
166 testable hypothesis that connect geochemical reservoirs with biological metabolisms —  
167 hypotheses that cannot be constructed from macroevolutionary or geological frameworks alone.

168

## 169 **2 MATERIALS AND METHODS**

### 170 **2.1 Ancestral reconstruction of nitrogenase protein sequences**

171 An initial dataset of extant nitrogenase Nif/Vnf/AnfHDK homologs was constructed by retrieving  
172 amino acid sequences from the National Center for Biotechnology Information non-redundant  
173 protein database, accessed September 2018 (O'Leary et al., 2016). Potential homologs were  
174 identified by BLASTp (Camacho et al., 2009) using query sequences from *A. vinelandii* (NifH:  
175 Avin\_01380, NifD: Avin\_01390, NifK: Avin\_01400) and an Expect value cutoff of  $<1e-5$ . The  
176 dataset was then manually curated to remove partial and distantly related sequences. Additional  
177 nitrogenase sequences were manually retrieved from the Joint Genome Institute Integrated  
178 Microbial Genomes and Microbiomes database, accessed September 2018 (Chen et al., 2019). The  
179 nitrogenase sequence dataset was finalized to include NifHDK sequences from 256 taxa, AnfHDK  
180 sequences from 14 taxa, VnfHDK sequences from 14 taxa, and outgroup light-independent  
181 protochlorophyllide oxidoreductase (Bch/ChlLNB) sequences — sharing distant homology with  
182 nitrogenases (Boyd, Anbar, et al., 2011; Y. Hu & Ribbe, 2015; Raymond et al., 2004) — from 10  
183 taxa (Appendix S1; additional analyses were performed with an expanded outgroup, Appendix  
184 S2). Only one Nif/Anf/VnfHDK sequence set was retained per genus to broaden taxonomic  
185 sampling. Equal sequence sampling for Anf and Vnf was made to remove the potential for  
186 oversampling bias in ancestral sequence inference. H-, D-, and K-subunit sequences corresponding

187 to each taxon were manually checked for synteny of their encoding genes. AnfHDK and VnfHDK  
188 sequences were identified by the proximity of each gene locus to *anfG* or *vnfG*, which encodes the  
189 additional G-subunit present in the VeFe or FeFe protein, respectively, but not present in the MoFe  
190 protein (Eady, 1996). Finally, the presence of the cofactor biosynthetic *nifBEN* genes was  
191 investigated for all taxa represented in our dataset by BLASTp, as well as by manually inspecting  
192 the *nif* genome region.

193  
194 Reconstruction of ancestral nitrogenase sequences was performed by PhyloBot (Hanson-Smith &  
195 Johnson, 2016) ([www.phylobot.com](http://www.phylobot.com)), which automates multiple sequence alignment,  
196 phylogenetic reconstruction, and ancestral sequence inference methods. The concatenated 294-  
197 sequence dataset of Nif/Anf/VnfHDK homologs (including 10 Bch/ChlLNB outgroup sequences)  
198 was aligned by MSAProbs v0.9 5r1 (Liu, Schmidt, & Maskell, 2010) and MUSCLE v3.8.31  
199 (Edgar, 2004). Both alignment outputs were then used to perform phylogenetic reconstruction by  
200 RAxML v8.1.15 (Stamatakis, 2014) under 6 different combinations of amino acid substitution and  
201 rate heterogeneity models. Branch support was evaluated by the approximate likelihood ratio test  
202 (aLRT) (Anisimova & Gascuel, 2006), which assesses the gain in overall likelihood against a null  
203 hypothesis of branch length = 0. Additional phylogenetic reconstructions with an expanded  
204 outgroup were performed outside of Phylobot to resolve root positioning, but were not used in  
205 subsequent ancestral sequence inference (Appendix S2). Ancestral sequences were inferred by  
206 joint maximum likelihood using CODEML v4.2 (Z. Yang, 2007) at all nodes within the 12  
207 Phylobot-constructed phylogenies (Tree-1 – Tree-12), with gaps inferred by parsimony. To assess  
208 ancestral sequence robustness to phylogenetic uncertainty (Hanson-Smith, Kolaczkowski, &  
209 Thornton, 2010), ancestors inferred from the top five phylogenies ranked by log likelihood scores

210 were selected for further analysis (Table 1, Appendix S2). Finally, to evaluate the effects of  
211 ambiguously reconstructed sites on subsequent structural analyses, Bayesian sampled ancestors  
212 were inferred from the maximum likelihood site posterior probabilities calculated by CODEML  
213 (Aadland et al., 2019). 100 random Bayesian sequence were generated for each of five ancestral  
214 nodes of interest across the top five phylogenies. Thus, 25 maximum likelihood and 2,500  
215 Bayesian-sampled ancestral sequences were analyzed in total. All maximum likelihood  
216 reconstructed trees and ancestral sequences are available for view and download at  
217 <http://phylobot.com/613282215/>.

218 **Table 1.** Alignment and evolutionary model parameter combinations for the top five phylogenies, ranked by log likelihood scores.

| 219 | <u>Phylogeny</u> | <u>Alignment method</u> | <u>Evolutionary model</u>        | <u>Log likelihood</u> | <u>Maximum likelihood ancestors</u> |
|-----|------------------|-------------------------|----------------------------------|-----------------------|-------------------------------------|
| 220 | Tree-1           | MSAProbs                | CAT + LG                         | -300069.08            | AncA-1 – AncE-1                     |
| 221 | Tree-2           | MSAProbs                | CAT + WAG                        | -303296.08            | AncA-2 – AncE-2                     |
| 222 | Tree-3           | MSAProbs                | $\Gamma$ + LG                    | -303951.21            | AncA-3 – AncE-3                     |
| 223 | Tree-4           | MUSCLE                  | CAT + LG                         | -304457.52            | AncA-4 – AncE-4                     |
| 224 | <u>Tree-5</u>    | <u>MSAProbs</u>         | <u><math>\Gamma</math> + WAG</u> | <u>-305229.49</u>     | <u>AncA-5 – AncE-5</u>              |

225 References: (Le & Gascuel, 2008; Quang, Gascuel, & Lartillot, 2008; Whelan & Goldman, 2001; Z. Yang, 1993)

226

## 227 **2.2 Structural homology modeling of extant and ancestral nitrogenase D-subunits**

228 Structural homology modeling of 33 extant and ancestral (25 maximum likelihood and 2,500  
229 Bayesian-sampled) nitrogenase D-subunit proteins was performed by Modeller v9.2 (Sali &  
230 Blundell, 1993). Extant nitrogenase sequences, broadly sampled from the reconstructed  
231 nitrogenase phylogeny, were modeled to provide comparisons with ancestral models. D-subunit  
232 sequences from extant and ancestral nitrogenases were aligned to 38 NifD and 2 VnfD structural  
233 templates retrieved from the Protein Data Bank (Berman et al., 2000), accessed November 2018  
234 (Appendix S5; published AnfD models not available at time of analysis). Information from all 40  
235 templates was used to model each structure. All models were generated by specifying the inclusion  
236 of the FeMo-cofactor of the 3U7Q NifD structure (Spatzal et al., 2011), selected as the highest  
237 resolution Mo-nitrogenase template. To assess the effect of the template cofactor type on the  
238 generated structure, additional models were constructed by specifying the inclusion of the FeV-  
239 cofactor of the 56NY VnfD template (D. Sippel & Einsle, 2017) (Appendix S5). 100 modeling  
240 replicates were performed per sequence and assessed by averaging over the scaled Modeller  
241 objective function, Discrete Optimized Protein Energy, and high resolution Discrete Optimized  
242 Protein Energy scores, as previously described (Aadland et al., 2019). The ten best modeling  
243 replicates per extant sequence, ten best replicates per maximum likelihood ancestral sequence, and  
244 the single best replicate per Bayesian-sampled variant sequence were selected for further analysis,  
245 totaling 3,080 models with the FeMo-cofactor specified.

246

## 247 **2.3 Active-site pocket volume calculation of extant and ancestral D-subunit models**

248 Volumes of the modeled ancestral and extant D-subunit active-site cofactor pockets were  
249 calculated by POVME v2.0 (Durrant, Votapka, Sorensen, & Amaro, 2014). Spatial coordinates

250 and the inclusion region for volume calculation were specified manually. Pocket volumes were  
251 calculated with a grid spacing of 0.5 Å and a 1.09 Å distance cutoff from any receptor atom's van  
252 der Waals radius. Volume outside of the modeled convex hull of the cofactor pocket as well as  
253 noncontiguous volume were removed. Statistical analysis of ancestral and extant pocket volume  
254 data was performed in R (R Core Team, 2014).

255

### 256 **3 RESULTS**

#### 257 **3.1 V- and Fe-nitrogenases diversified after Mo-nitrogenases**

258 We reconstructed the phylogenetic history of Mo-, V-, and Fe-nitrogenases and to infer ancestral  
259 nitrogenase sequences and associated indicators of nitrogenase metal dependence.  
260 Nif/Anf/VnfHDK protein homologs curated from the National Center for Biotechnology  
261 Information and Joint Genome Institute databases represent 20 bacterial and archaeal phyla, 11 of  
262 which are known from experimental investigations to include diazotrophic taxa (Dos Santos et al.,  
263 2012; Ormeño-Orrillo, Hungria, & Martinez-Romero, 2013) (Appendix S1). The five most  
264 represented phyla in our dataset — Bacteroidetes, Cyanobacteria, Firmicutes, Proteobacteria, and  
265 Euryarchaeota — encompass ~80% of the curated sequences. Our dataset also presents genomic  
266 evidence of nitrogen fixation within the Acidobacteria, Actinobacteria, Aquificae, Chlorobi,  
267 Chloroflexi, Chrysiogenetes, Deferribacteres, Elusimicrobia, Fusobacteria, Lentisphaerae,  
268 *Candidatus* Margulisbacteria, Nitrospirae, Planctomycetes, Spirochaetes, and Verrucomicrobia.

269

270 Our maximum likelihood nitrogenase phylogeny segregates Nif/Anf/VnfHDK sequences into two  
271 major lineages similarly observed in previous studies (Boyd, Anbar, et al., 2011; Raymond et al.,  
272 2004) (Tree-1; **Figure 2**): the first comprises Nif-I and Nif-II Mo-nitrogenases (aerobic/facultative

273 bacteria and anaerobic/facultative bacteria/archaea, respectively; highlighted in blue) (Raymond  
274 et al., 2004), and the second comprises V- and Fe-only-nitrogenases (Vnf and Anf, respectively;  
275 highlighted in red) as well as three clades of “uncharacterized” nitrogenases that lack extensive  
276 experimental characterization with regard to metal dependence (Mb-Mc, highlighted in purple; F-  
277 Mc, highlighted in green; Clfx, highlighted in yellow) (Boyd, Hamilton, et al., 2011; Dekas,  
278 Poretsky, & Orphan, 2009; Dos Santos et al., 2012; Mehta & Baross, 2006). We additionally  
279 analyzed four alternate phylogenies (ranked by log likelihood scores), reconstructed by varying  
280 alignment methods, amino acid substitution models, and rate heterogeneity models (Tree-2–Tree-  
281 5; Appendix S2). The aforementioned major nitrogenase clades are present across all alternate  
282 phylogenetic topologies. Branch ordering of these major clades is similarly consistent, with the  
283 exception of root position: in Tree-3 and Tree-5, the root is placed between Nif-I and Nif-  
284 II/uncharacterized/Anf/Vnf, rather than between Nif-I/Nif-II and uncharacterized/Anf/Vnf as in  
285 Tree-1, Tree-2, and Tree-4. Nevertheless, additional phylogenetic analyses incorporating an  
286 expanded outgroup provide stronger support for the root position of Tree-1, Tree-2, and Tree-4  
287 (Appendix S2).

288  
289 In all analyzed nitrogenase phylogenies, Vnf and Anf sequences (highlighted in red) form  
290 reciprocally monophyletic clades that branch immediately distal to Mb-Mc nitrogenases  
291 (highlighted in purple) (**Figure 2**, Appendix S2). The reciprocal monophyly of Vnf and Anf, as  
292 well as the clustering of Mb-Mc, Vnf, and Anf, is well-supported across all phylogenetic  
293 topologies (aLRT > 10<sup>6</sup>). The Mb-Mc clade is composed of archaeal hydrogenotrophic  
294 methanogens within classes Methanobacteria and Methanococci. Because all Mb-Mc taxa possess  
295 *nifBEN* genes demonstrated to be necessary for the synthesis of the FeMo-cofactor (Curatti et al.,

16

296 2007; Dos Santos et al., 2012; Shah et al., 1994; Shah et al., 1986; St John et al., 1975; Tal et al.,  
 297 1991), it is likely that Mb-Mc nitrogenases are Mo-dependent (Boyd, Hamilton, et al., 2011). Thus,  
 298 the phylogenetic positioning of Vnf and Anf is consistent with previous suggestions that V- and  
 299 Fe-nitrogenases diversified after Mo-nitrogenases (Boyd, Hamilton, et al., 2011).  
 300

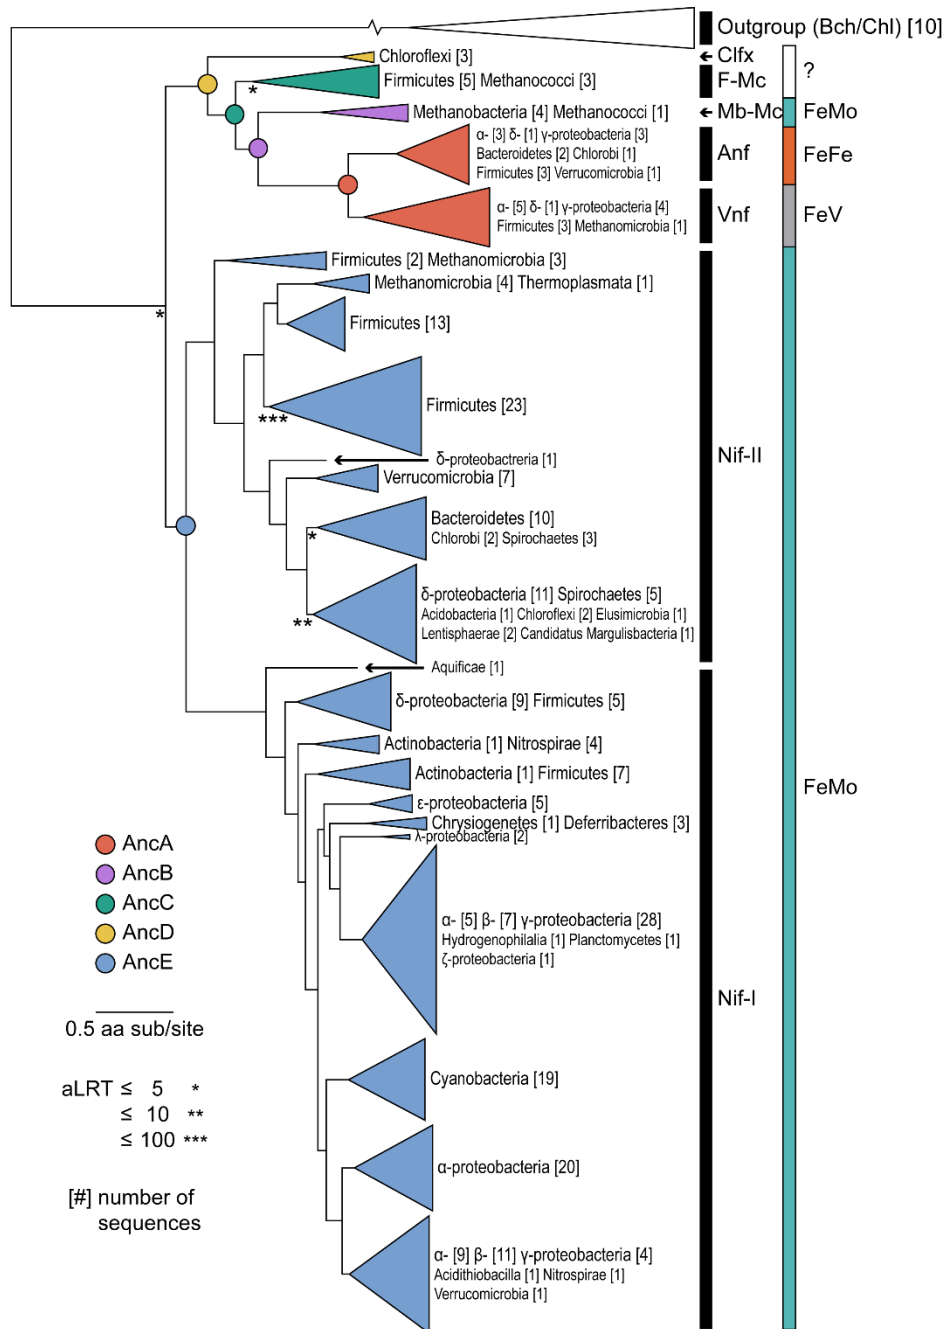

301



302 **Figure 2.** Maximum likelihood phylogeny of concatenated Nif/Anf/VnfHDK nitrogenase and  
303 Bch/ChlLNB outgroup protein sequences (Tree-1; see Table 1). Ancestral nodes analyzed in this  
304 study are labeled AncA–AncE. Known active-site cofactor metal content is listed on the right.  
305 Branch support is derived from the approximate likelihood ratio test (aLRT). Branch length scale  
306 is in units of amino acid substitutions per site. Outgroup branch break used to conserve space; true  
307 branch length = 5.578 substitutions per site. Phylogeny coloring is as follows: Clfx, yellow; F-Mc,  
308 green; Mb-Mc, purple; Anf/Vnf, red; Nif-I/-II, blue.

309

### 310 **3.2 Basal uncharacterized nitrogenases lack associated genes necessary for FeMo-cofactor** 311 **synthesis**

312 In addition to investigating the phylogenetic relationships between Mo-, V-, and Fe-nitrogenase  
313 isozymes, we mapped the presence of the biosynthetic *nifB*, *nifE*, and *nifN* genes — necessary for  
314 FeMo-cofactor assembly (Curatti et al., 2007; Dos Santos et al., 2012; Shah et al., 1994; Shah et  
315 al., 1986; St John et al., 1975; Tal et al., 1991) — among taxa represented in our dataset. All  
316 analyzed taxa possess the full complement of *nifBEN* biosynthetic genes, with the exception of  
317 two uncharacterized clades: Clfx (highlighted in yellow) and F-Mc (highlighted in green) (**Figure**  
318 **2**). Within the lineage containing Vnf and Anf nitrogenases, Clfx and F-Mc clades are most basal.  
319 These branching positions of Clfx and F-Mc clades within the Vnf/Anf lineage are consistently  
320 observed across all phylogenetic topologies (Trees-1–5; Appendix S2) and are well-supported  
321 (aLRT > 10<sup>3</sup> for Clfx, aLRT > 10<sup>18</sup> for F-Mc). In Tree-1-, 2-, and -4, as well as in trees  
322 reconstructed with an expanded outgroup (Appendix S2), Clfx and F-Mc clades also branch  
323 immediately distal to the root.

324

325 Both basal Clfx and F-Mc nitrogenases are mostly derived from thermophilic hosts, and lack one  
326 or more associated *nifEN* cofactor biosynthesis genes. Clfx nitrogenases, constituting the most  
327 basal uncharacterized clade within the uncharacterized/Vnf/Anf lineage, are in the present dataset  
328 derived from three mesophilic or thermophilic Chloroflexi species (**Figure 2**, highlighted in  
329 yellow). The *nif* clusters of Clfx taxa lack both *nifE* and *nifN* genes, and the typically continuous  
330 *nifHDK* genes observed in other taxa are instead interrupted by *nifB* (arranged *nifHBDK*) (Setubal  
331 et al., 2009). F-Mc nitrogenases branch immediately distal to the Clfx clade and represent eight  
332 thermophilic Firmicutes and archaeal methanogen (class Methanococci) taxa (**Figure 2**,  
333 highlighted in green). F-Mc species possess biosynthetic *nifB* and *nifE* genes, but not *nifN*, with  
334 the exception of *Methanothermococcus thermolithotrophicus* that retains *nifN*. A previous study  
335 found that sequence features and modeled structural features of F-Mc nitrogenases closely  
336 resemble those of Mo-nitrogenases (McGlynn, Boyd, Peters, & Orphan, 2012). However, the  
337 absence of *nifN* in most F-Mc taxa suggests that these strains are not capable of synthesizing the  
338 FeMo-cofactor. Though the lack of *nifE* and/or *nifN* genes in Clfx and F-Mc taxa might  
339 additionally suggest that such strains cannot express functional nitrogenases, some have been  
340 experimentally observed to fix nitrogen: the Clfx species *Oscillochloris trichoides* (lacking *nifEN*)  
341 (Keppen, Lebedeva, Troshina, & Rodionov, 1989; Kuznetsov et al., 2011) and the F-Mc species  
342 *Methanocaldococcus* sp. FS406-22 (lacking *nifN*) (Keppen et al., 1989; Kuznetsov et al., 2011;  
343 Mehta & Baross, 2006), in addition to uncharacterized anaerobic methane-oxidizing archaea not  
344 included in the present study (Dekas et al., 2009). The ability of early-branching Clfx and F-Mc  
345 nitrogenases to fix nitrogen in the absence of *nifEN* genes may indicate an atypical pathway for  
346 cofactor assembly and incorporation not used for extant Mo-, V-, and Fe-nitrogenases.  
347

### 348 **3.3 High statistical support for ancestral nitrogenase active-site residues**

349 We inferred ancestral sequences for each of the H-, D-, and K-subunits that constitute the  
350 nitrogenase enzyme complex (**Figure 1**) across five phylogenetic topologies (Tree-1–5; Appendix  
351 S2). Ancestral nitrogenase sequences were inferred for five well-supported internal nodes along a  
352 phylogenetic transect between Mo- (highlighted in blue) and V-/Fe-nitrogenases (highlighted in  
353 red) (**Figure 2**). The five targeted nodes are: AncA (ancestral to Anf and Vnf), AncB (ancestral to  
354 AncA and Mb-Mc), AncC (ancestral to AncB and F-Mc), AncD (ancestral to AncC and Clfx), and  
355 AncE (ancestral to Nif-I and Nif-II). Thus, AncA–D are nested, whereas AncE lies along a  
356 divergent lineage toward Nif-I and Nif-II Mo-nitrogenases. For further analyses, we selected the  
357 maximum likelihood ancestral sequence per target node from each of the five phylogenies (Tree-  
358 1–5), totaling 25 sequences. Due to differences in root position, identical AncE nodes were not  
359 present across all topologies and analogous nodes were instead selected (Appendix S2). Ancestral  
360 sequences are hereafter labeled with the tree likelihood rank from which they were inferred (e.g.,  
361 AncA from Tree-1 is labeled AncA-1). All tree and ancestral sequence information can be found  
362 at <http://phylobot.com/613282215/>.

363  
364 Mean site posterior probabilities for ancestral nitrogenase HDK sequences across all phylogenies  
365 range between ~0.83 and 0.91, and for the highest-likelihood phylogeny (Tree-1), between ~0.84  
366 and 0.90 (Appendix S3). Ancestral sequence support generally decreases with increasing  
367 phylogenetic node age. For example, within the uncharacterized/V-/Fe-nitrogenase lineage, AncA-  
368 1 has the highest mean posterior probability ( $0.90 \pm 0.18$ ) and AncD-1 has the lowest mean  
369 posterior probability ( $0.84 \pm 0.22$ ). Mean ancestral sequence probability for each node also does  
370 not deviate by more than ~0.02 across each of the five phylogenetic topologies (Tree-1–5;

371 Appendix S3). These observations suggest that sequence support for ancestral nitrogenases is more  
372 sensitive to ancestral node position than to topological differences between the analyzed trees.  
373  
374 In addition to surveying total ancestral HDK sequence support, we analyzed support for 30 active-  
375 site residues, defined as those residing within 5 Å of any atom in either the FeMo-cofactor of the  
376 *A. vinelandii* NifD protein (PDB 3U7Q (Spatzal et al., 2011)) or the FeV-cofactor of the *A.*  
377 *vinelandii* VnfD protein (PDB 5N6Y (D. Sippel & Einsle, 2017)) (**Figure 3**). These active-site  
378 residues are not contiguous but are instead scattered throughout the D-subunit sequence. Mean  
379 posterior probabilities of ancestral active-site residues, which range between 0.92 to 0.98 across  
380 all phylogenies, are consistently greater than those of entire reconstructed nitrogenase HDK  
381 sequences (0.83–0.91) (Appendix S3). Of the 30 active-site residues, only five sites have, in one  
382 or more ancestral sequences, plausible alternative reconstructions with posterior probabilities >  
383 0.30: sites 59, 69, 358, 360, 425, 441 (site numbering both here and hereafter based on *A. vinelandii*  
384 NifD). No ancestral sequences have more than three active-site residues with such plausible  
385 alternative reconstructions. Ten active-site residues are conserved across all analyzed extant  
386 nitrogenases: Val-70, Gln-191, His-195, Cys-275, Arg-277, Ser-278, Gly-356, Phe-381, Gly-424,  
387 His-442. These conserved residues are thus reconstructed in all ancestral nitrogenases  
388 unambiguously (site posterior probability = 1.00). Statistical support for ancestral active-site  
389 residues (greater than 0.92) underpins subsequent analyses of ancestral active-site properties that  
390 may inform inferences of nitrogenase metal dependence.

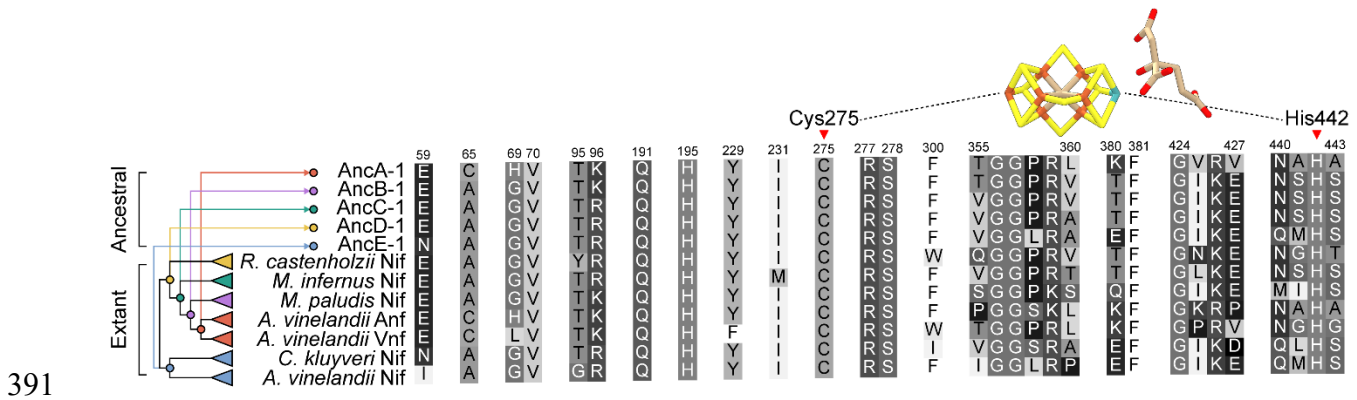

391  
392 **Figure 3.** Active-site protein environment of representative ancestral and extant nitrogenases. All  
393 residues located within 5 Å of any atom in either the FeMo-cofactor of the *A. vinelandii* NifD  
394 protein (PDB 3U7Q (Spatzal et al., 2011)) or the FeV-cofactor of the *A. vinelandii* VnfD protein  
395 (5N6Y (D. Sippel & Einsle, 2017)). Residue numbering from aligned *A. vinelandii* NifD. Cys-275  
396 and His-442 residues that coordinate the cofactor are indicated by red arrows. Phylogeny coloring  
397 is as follows: Clfx, yellow; F-Mc, green; Mb-Mc, purple; Anf/Vnf, red; Nif-I/II, blue.

398

### 399 **3.4 Active-site structural features are uninformative for inferring ancestral metal** 400 **dependence**

401 To investigate metal-specific features of ancestral nitrogenase structures, we generated homology  
402 models of both extant and ancestral nitrogenase D-subunits that house the active site (**Figure 4a**).  
403 First, we modeled 33 broadly sampled extant nitrogenase NifD, VnfD, and AnfD sequences to  
404 benchmark classifications of ancestral nitrogenase models. Second, we calculated structural  
405 models of 25 nitrogenase ancestors inferred by maximum likelihood and of 2,500 ancestors  
406 inferred by random Bayesian sampling of maximum likelihood site posterior probabilities (100  
407 Bayesian samples per maximum likelihood ancestor). We generated ten model replicates per extant  
408 sequence and maximum likelihood sequence, and one model per Bayesian-sampled sequence. All  
409 structures were modeled with the FeMo-cofactor included (additional modeling runs were

410 executed with the FeV-cofactor included; Appendix S5). In total, 3,080 models were generated  
411 with the FeMo-cofactor.

412

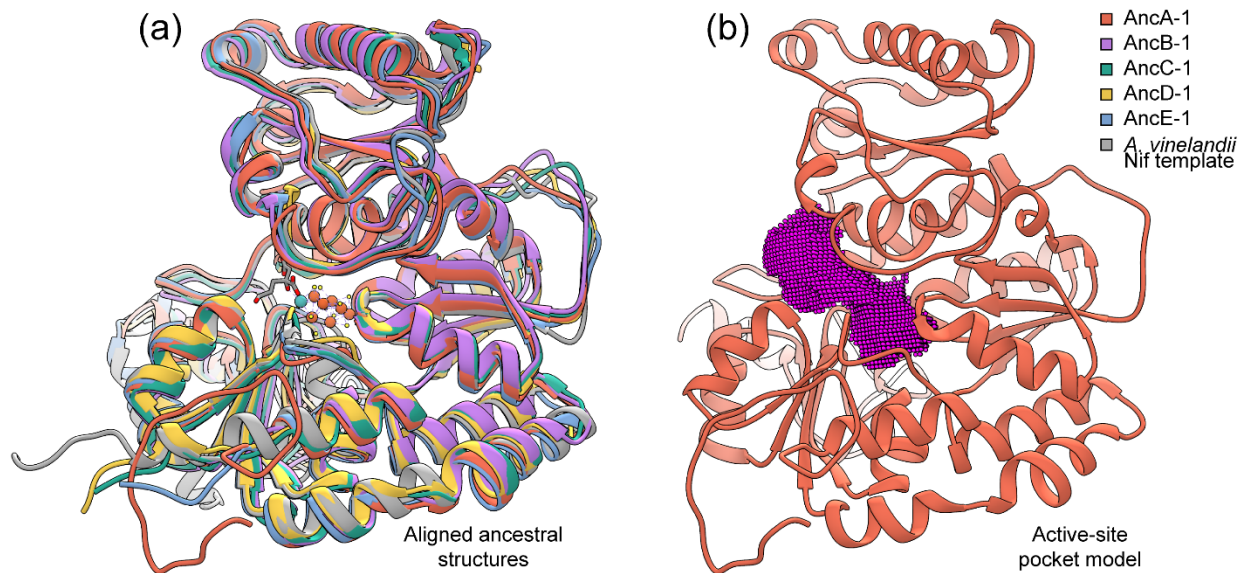

413

414 **Figure 4.** Structural and active-site pocket modelling of ancestral nitrogenases (a) Modeled D-  
415 subunit protein structures of ancestral nitrogenases inferred from the highest-likelihood phylogeny  
416 (Tree-1; **Figure 2**) aligned to an *A. vinelandii* Nif structural template (PDB 3U7Q (Spatzal et al.,  
417 2011)). (b) Example of a modeled active-site pocket for ancestral nitrogenase AncA-1. The 0.5-  
418 Å-resolution point field generated for pocket volume calculation is shown in pink.

419

420 For each of the 3,080 extant and ancestral D-subunit nitrogenase models, we calculated the volume  
421 of the active-site pocket (**Figure 4b**), a parameter previously used to classify the metal dependence  
422 of extant uncharacterized nitrogenases (McGlynn et al., 2012). These pocket volume values are  
423 plotted in **Figure 5**. Among modeled extant nitrogenases, mean pocket volumes are  $1175.12 \pm$   
424  $51.93 \text{ \AA}^3$  for Mo-nitrogenases,  $1121.86 \pm 36.36 \text{ \AA}^3$  for V-nitrogenases, and  $963.39 \pm 75.80 \text{ \AA}^3$  for  
425 Fe-nitrogenases.

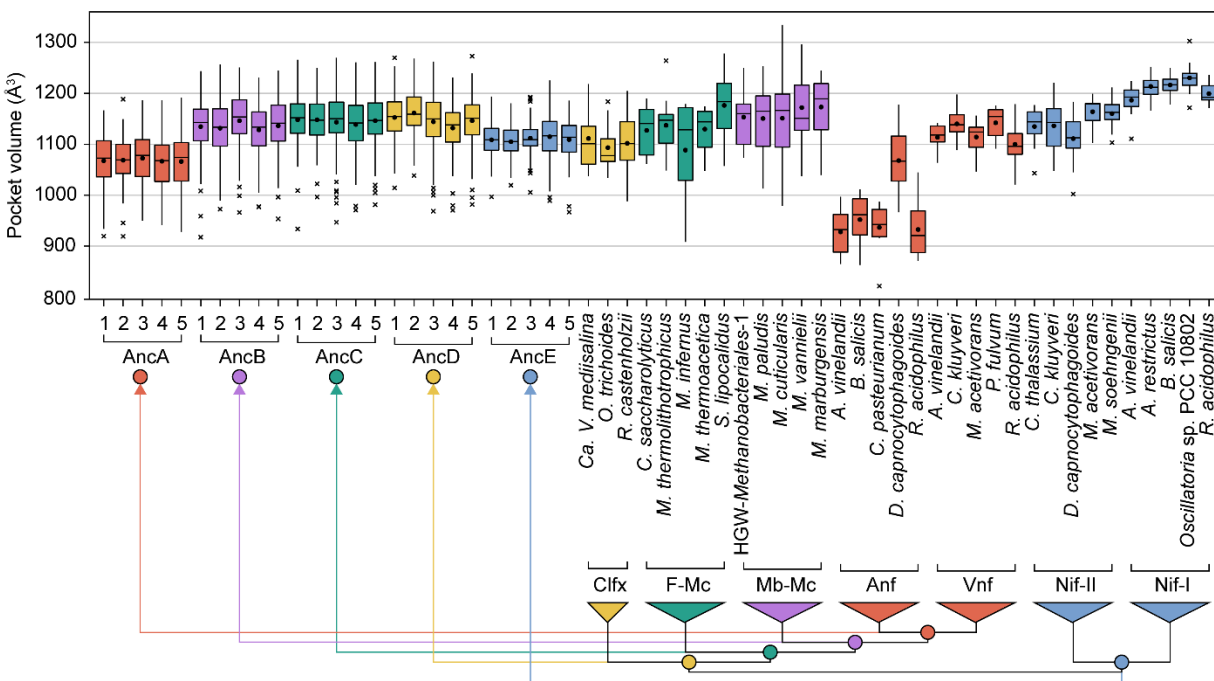

426  
 427 **Figure 5.** Extant and ancestral nitrogenase active-site pocket volumes. Pocket volumes calculated  
 428 for ancestral and representative extant nitrogenase D-subunit structures modeled with the FeMo-  
 429 cofactor. Each ancestral plot contains 110 volume calculations (ten model replicates per maximum  
 430 likelihood sequence plus one model for each of 100 Bayesian-sampled sequences) and each extant  
 431 plot contains 10 volume calculations (10 model replicates per extant sequence). Median values are  
 432 indicated by bars, mean values by points, the range (excluding outliers) by whiskers, and outliers  
 433 by crosses. Phylogeny coloring is as follows: Clfx, yellow; F-Mc, green; Mb-Mc, purple; Anf/Vnf,  
 434 red; Nif-I/-II, blue.

435  
 436 We observe less difference between mean pocket volumes of extant V-nitrogenases ( $1121.86 \pm$   
 437  $36.36 \text{ \AA}^3$ ) and Nif-II Mo-nitrogenases ( $1141.13 \pm 46.30 \text{ \AA}^3$ ) than between Nif-I ( $1209.11 \pm 30.79$   
 438  $\text{ \AA}^3$ ) and Nif-II Mo-nitrogenases. A statistical nonparametric test of volume median differences also  
 439 suggests greater similarity between V- and Nif-II Mo-nitrogenases than between Nif-I and Nif-II  
 440 nitrogenases (Appendix S5). All V-nitrogenase and Nif-II Mo-nitrogenase volume values range

441 between 1002.13 and 1220.63 Å<sup>3</sup>, which problematically overlap with the volume ranges of AncB  
442 (917.38–1256.25 Å<sup>3</sup>), AncC (933.75–1269.50 Å<sup>3</sup>), AncD (968.50–1272.75 Å<sup>3</sup>), and AncE  
443 (966.75–1225.25 Å<sup>3</sup>) ancestral models, as well as ranges for uncharacterized Clfx (988.25–  
444 1218.13 Å<sup>3</sup>) and F-Mc (908.00–1277.75 Å<sup>3</sup>) nitrogenases. The volume range of AncA models  
445 (919.00–1191.13 Å<sup>3</sup>) lies between the ranges of both V- (1020.75–1197.63 Å<sup>3</sup>) and Fe-  
446 nitrogenases (821.38–1177.00 Å<sup>3</sup>). These same overall patterns are observed when comparing only  
447 maximum likelihood ancestral models or Bayesian-sampled ancestral models, as well as alternate  
448 modeling runs with the FeV-cofactor (Appendix S5). Greater similarities between V- and Nif-II  
449 Mo-nitrogenases than between Nif-I and Nif-II Mo-nitrogenases suggests that, contrary to  
450 previous analyses (McGlynn et al., 2012), modeled pocket volume may be uninformative for  
451 inferring ancestral metal dependence. At the very least, the overlap in volume ranges between  
452 ancestors and extant isozymes of varying metal dependence in our analyses preclude the  
453 unambiguous classification of ancestral metal dependence by these structural features.

454

### 455 **3.5 Oldest ancestral nitrogenase active-site sequences resemble those of Mo-nitrogenases**

456 We analyzed sequence features of both ancestral and extant nitrogenases to identify those  
457 correlated with metal dependence. In particular, we focused on nitrogenase active-site sequences  
458 for three reasons: (1) active-site residues are known to affect catalytic efficiency and substrate  
459 specificity (Brigle et al., 1987; Christiansen, Cash, Seefeldt, & Dean, 2000; Fixen et al., 2016;  
460 Kim, Newton, & Dean, 1995; Sarma et al., 2010; Z. Y. Yang, Moure, Dean, & Seefeldt, 2012) and  
461 thus may be tuned to nitrogenase metal dependence (2) active-site sequence features have  
462 previously been used to classify the metal dependence of extant uncharacterized nitrogenases



463 (McGlynn et al., 2012) (3) ancestral active-site residues are reconstructed here with high statistical  
464 support as compared to the total HDK sequence (see Section 3.3).

465  
466 We first assessed the sensitivity of ancestral sequence variation to phylogenetic uncertainty and  
467 ancestral statistical support. Overall, mean identities for ancestral sequences compared across  
468 different nodes range from ~55 to 90%. Ancestral sequences inferred from the same node across  
469 alternate phylogenies (Tree-1–5) have relatively high mean identities, ranging from ~93 to 95%  
470 across the total HDK sequence and from ~96 to 100% within the active site. These high mean  
471 identities suggest that topological differences among the alternate phylogenies used for ancestral  
472 sequence inference do not contribute to a high degree of ancestral sequence variation. Identities  
473 among sequences inferred from the same node also do not appear to be correlated with statistical  
474 support. For example, though full AncA HDK sequences are reconstructed with the highest mean  
475 statistical support (~0.89–0.91), they exhibit neither the lowest nor the highest mean identities as  
476 compared with sequences inferred from other nodes (Appendix S3).

477  
478 We next identified specific residues within the nitrogenase active site that are unique to particular  
479 isozymes of known metal dependence in order to survey their occurrence in ancestral sequences.  
480 We found that three active-site residues are unique to Mo-nitrogenases, six are unique to V-  
481 nitrogenases, five are unique to Fe-nitrogenases, and six are unique to V- and Fe-nitrogenases  
482 (Appendix S4). Surprisingly, most nitrogenase ancestors exhibit comparable numbers of residues  
483 unique to either V-/Fe-nitrogenases or Mo-nitrogenases, and thus their occurrence does not appear  
484 informative for inferring ancestral metal dependence (e.g., ancestral AncC sequences contain two  
485 residues unique to V-/Fe-nitrogenases and two residues unique to Mo-nitrogenases). An exception

486 is AncA sequences, which contain a preponderance of active-site residues that are unique to extant  
487 V- and Fe-nitrogenases. One of the residues unique to V-nitrogenases, Thr-355, has recently been  
488 suggested to interact directly with a proposed carbonate ligand only present in the FeV-cofactor  
489 (D. Sippel & Einsle, 2017). This carbonate ligand lies within a protein loop that also contains Pro-  
490 358, unique to V-nitrogenases, and Leu-360, unique to V- and Fe-nitrogenases. These Thr-355,  
491 Pro-358, and Leu-360 residues are observed across all AncA sequences, reflecting specific  
492 sequence resemblances that may be associated with V-dependence.

493

494 In addition to analyzing specific active-site residues, we compared the total active-site sequence  
495 composition of 25 ancestral nitrogenases (inferred across Tree-1–5) and all 284 extant nitrogenase  
496 sequences used for phylogenetic reconstruction. Our analysis shows clear distinctions between the  
497 active-site compositions of extant Mo- versus V-/Fe-nitrogenases (**Figure 6a**). Specifically, the  
498 mean identity between Vnf/Anf and Nif-I/Nif-II is ~50%, as compared with the mean identity  
499 between Vnf and Anf (~71%) and between Nif-I and Nif-II (~77%). The difference between  
500 Vnf/Anf and Nif-I/Nif-II sequences is not seen as distinctly when comparing total HDK sequences  
501 (**Figure 6b**), suggesting that the active-site sequence differences in particular may be better  
502 indicators of metal dependence than whole sequence differences due to greater catalytic tuning  
503 toward the cofactor.

504

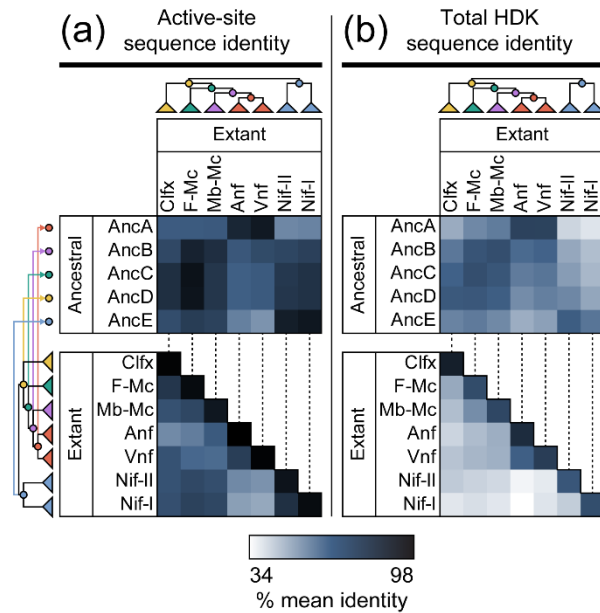

505

506 **Figure 6.** Active-site and full HDK sequence comparisons between extant and ancestral  
507 nitrogenases. (a) Active-site sequence identities of ancestral and extant nitrogenases. Active-site  
508 residues include 30 amino acids positioned within 5 Å of the active-site cofactor. (b) Total HDK  
509 sequence identities of ancestral and extant nitrogenases. Percentage identity values have been  
510 averaged within each field of comparison. All 25 maximum likelihood ancestors and 284 extant  
511 sequences included in this study were used for sequence identity calculation. Phylogeny coloring  
512 is as follows: Clfx, yellow; F-Mc, green; Mb-Mc, purple; Anf/Vnf, red; Nif-I/-II, blue.

513

514 Because we observed active-site sequence distinctions between extant Vnf/Anf and Nif-I/Nif-II  
515 nitrogenases, we compared active-site sequences of ancestral versus extant nitrogenases to provide  
516 clues regarding ancestral metal dependence. Nearly all ancestral nitrogenases, including those  
517 inferred for the oldest ancestral nodes, share greater active-site identity with Mo-nitrogenases than  
518 with V-/Fe-only-nitrogenases (**Figure 6a**). Mean active-site sequence identities between AncB–  
519 AncE and Anf/Vnf nitrogenases range between ~50 and 63%, whereas those between AncB–AncE  
520 and Nif-I/Nif-II nitrogenases range between ~69 and 87%. An exception is AncA (ancestral to Vnf

521 and Anf), which has higher mean identity to Anf/Vnf nitrogenases (~85%) than to Nif-I/Nif-II  
522 nitrogenases (~51%). Because active-site sequence identity can reliably differentiate extant Mo-  
523 from V-/Fe-nitrogenases, the resemblance of most ancestral active sites to those of Mo-  
524 nitrogenases is suggestive of Mo-dependence.

525

#### 526 **4 DISCUSSION**

527 Nitrogenase mediates the reduction of N<sub>2</sub> to NH<sub>3</sub>, a key step in nitrogen fixation (Anbar & Knoll,  
528 2002; Canfield et al., 2010; Falkowski, 1997). The metal dependence of nitrogenase, which  
529 impacts both catalytic properties (Eady, 1996; Harris, Yang, et al., 2018; Y. Hu et al., 2011; Lee  
530 et al., 2018; Rebelein et al., 2018; Zheng et al., 2018) and ecological distribution (McRose, Zhang,  
531 Kraepiel, & Morel, 2017; Zhang et al., 2016), suggests a potential role for marine geochemical  
532 constraints on its evolution (Anbar & Knoll, 2002; Boyd, Hamilton, et al., 2011; Canfield et al.,  
533 2010; Raymond et al., 2004). Thus, understanding ancestral nitrogenase metal dependence can  
534 help resolve the early history of biological nitrogen fixation, and, in a broader sense, the impact  
535 that ancient metal availabilities have had on the evolution of biologically essential metabolisms  
536 over Earth history (Anbar & Knoll, 2002; Moore, Jelen, Giovannelli, Raanan, & Falkowski, 2017).  
537 Previous phylogenetic work has established that Mo-, V-, and Fe-nitrogenases, though genetically  
538 distinct, are evolutionarily homologous (Boyd, Anbar, et al., 2011; Boyd, Hamilton, et al., 2011;  
539 Raymond et al., 2004). Most recent phylogenetic analyses also indicate that V- and Fe-  
540 nitrogenases are derived from Mo-nitrogenases, the latter having originated following the gene  
541 duplication event that produced *nifE* and *nifN* (Boyd, Anbar, et al., 2011). However, the precise  
542 trajectory of metal-binding evolution in the nitrogenase family is not completely known, and

543 discrepancies between current phylogenetics-based models and the geochemical record of nitrogen  
544 fixation remain (Stueken et al., 2015).

545  
546 We used both phylogenetic reconstruction and ancestral sequence inference to explore these  
547 outstanding questions of early nitrogenase evolution and metal dependence. Though the tree  
548 reconstructions presented here are largely in congruence with previous phylogenetic analyses,  
549 certain topological differences, particularly with regard to basal uncharacterized nitrogenases  
550 lacking associated *nifE* and/or *nifN* genes, suggest important deviations from previous narratives  
551 of early metal dependence (Boyd, Anbar, et al., 2011; Boyd, Hamilton, et al., 2011; Boyd & Peters,  
552 2013; Raymond et al., 2004). The reconstruction of ancestral nitrogenase sequences *in silico*  
553 provides the means to directly infer ancient metal-binding properties from molecular information.

554

#### 555 **4.1 Inferred metal dependence of ancestral nitrogenases**

556 The active-site protein environment is known, in addition to the metal content of the cofactor, to  
557 contribute to the variable catalytic properties of different nitrogenase isozymes (Brigle et al., 1987;  
558 Christiansen et al., 2000; Fixen et al., 2016; Kim et al., 1995; Sarma et al., 2010; Z. Y. Yang et al.,  
559 2012). We therefore explored active-site features of ancestral nitrogenases for correlations with  
560 metal dependence.

561

562 We find that modeled active-site structural features are not informative for the inference of  
563 ancestral metal dependence. Pocket volumes of modeled extant nitrogenases do not appear to be  
564 strongly correlated with metal cofactor content. Problematically, the volume ranges of oldest  
565 ancestors (as well as those of uncharacterized nitrogenases) overlap with both V- and Mo-

566 nitrogenases (**Figure 5**). We acknowledge that these homology modeling results may not precisely  
567 reflect true biological differences (for which a comprehensive analysis is not yet possible due the  
568 limited availability of V- and Fe-nitrogenase structures). This is illustrated by the difference  
569 between pocket volumes of published structures and those of homology models (e.g., *A. vinelandii*  
570 PDB 3U7Q NifD structure pocket volume  $\approx 994.750$  and mean *A. vinelandii* NifD modeled  
571 structure pocket volume  $\approx 1186.412$ ). However, it is not surprising that active-site pocket volume  
572 does not predict metal dependence, given the probable similar sizes and structures of the FeMo-,  
573 FeV-, and FeFe-cofactors (Eady, 1996; Krahn et al., 2002; Daniel Sippel et al., 2018; Spatzal et  
574 al., 2011). These findings contrast with a previous study by McGlynn and coworkers (2012) in  
575 which pocket volume comparisons were used to classify the Mo-dependence of uncharacterized  
576 nitrogenases. In this previous study, the volume means for Mo-nitrogenases were sufficiently  
577 distinct from V- and Fe-nitrogenases as to provide unambiguous classification of Mo-dependence.  
578 Our analyses differ from this previous study in several ways: (1) we incorporated V-nitrogenase  
579 structural templates (D. Sippel & Einsle, 2017; Daniel Sippel et al., 2018) for homology modeling,  
580 not available at the time of the previous study (2) we modeled 20 extant sequences of known metal  
581 dependence rather than 12 (3) we used the same explicit parameters for both homology modeling  
582 and pocket volume calculation across all sequences (4) we included modeling replicates for pocket  
583 volume calculation. Thus, an expanded modeling analysis appears to reduce the efficacy of the  
584 pocket volume parameter for inference of ancestral (and uncharacterized) nitrogenase metal  
585 dependence.

586  
587 Unlike structure-based analyses, we find that active-site sequence features reliably differentiate  
588 Mo-nitrogenases and V-/Fe-nitrogenases. Regarding AncA (ancestral to V- and Fe-nitrogenases),

589 we identified specific active-site residues that have previously been suggested to interact with a  
590 proposed carbonate ligand unique to the FeV-cofactor. These residues form a <sup>355</sup>TGGPRL<sup>360</sup> loop  
591 conserved only among V-nitrogenases and homologous to <sup>355</sup>IGGLRP<sup>360</sup> in *A. vinelandii* NifD (D.  
592 Sippel & Einsle, 2017). This substitution of Thr-355 for Ile-355, as well as the exchange of Leu  
593 and Pro positions may permit the inclusion of the FeV-cofactor carbonate ligand by VnfD that is  
594 not possible by the NifD protein (D. Sippel & Einsle, 2017). Thr-355 and Pro-358 are unique to  
595 V-nitrogenases, and Leu-360 is unique to V- and Fe-nitrogenases. All AncA sequences conserve  
596 the <sup>355</sup>TGGPRL<sup>360</sup> residue loop capable of accommodating the FeV-cofactor. Furthermore, AncA  
597 sequences generally exhibit greater numbers of residues unique to V-nitrogenases than those  
598 unique to Fe-nitrogenases, and the mean identity of AncA active-site sequences is highest for V-  
599 nitrogenases (**Figure 6a**). Together, these observations suggest that AncA is V-dependent.

600  
601 Our comparisons of ancestral and extant sequence features indicate that the active-sites of oldest  
602 nitrogenase ancestors (AncB–AncE) resemble those of extant Mo-nitrogenases more than V- or  
603 Fe-nitrogenases (**Figure 6a**). This observation is particularly significant given that these same  
604 patterns are not observed across the total HDK sequence (**Figure 6b**). Specifically, this  
605 discrepancy supports the notion that the nitrogenase active-site has been tuned to the catalytic  
606 properties of each metal cofactor over its evolutionary history (Harris, Yang, et al., 2018), and that  
607 this tuning has manifested in active-site sequence differences that stand apart from baseline  
608 phylogenetic distance. Though we are not able to identify specific residues that may functionally  
609 relate to metal dependence (as with AncA), the resemblance of the early ancestral nitrogenase  
610 active site to those of Mo-nitrogenases is highly suggestive of ancient Mo-dependence.

611

## 612 **4.2 A proposed model for the evolution of nitrogenase metal dependence over geologic time**

613 Despite the lack of information provided by structural analyses, the active-site sequence features  
614 of oldest ancestral nitrogenases (i.e., AncB–E) support the inference of early Mo-dependence. The  
615 observation that ancestral AncC and AncD active sites in particular most resemble those of extant  
616 Mo-nitrogenases is at odds with the phylogenetic distribution of *nifE* and *nifN* genes, which  
617 suggest that early-branching uncharacterized Clfx and F-Mc taxa (for which AncC and AncD are  
618 ancestral) are not capable of assembling the FeMo-cofactor. The placement of Clfx and F-Mc  
619 clades in our analyses differs from previous phylogenetic reconstructions. For example, the  
620 phylogenetic tree presented by Boyd and coworkers nests Clfx and F-Mc clades within Mo-  
621 nitrogenases, which notably branch more recently than V-, Fe-, and Mb-Mc Mo-nitrogenases  
622 (Boyd, Hamilton, et al., 2011). A subsequently published topology is more similar to the tree  
623 presented here, though lacking in Clfx sequences (Boyd, Costas, Hamilton, Mus, & Peters, 2015;  
624 Boyd & Peters, 2013). It is possible that the larger sequence dataset used here has refined the  
625 placement of these uncharacterized clades, which is supported by our analyses with an expanded  
626 outgroup that maintains the positions of Clfx and F-Mc sequences (Appendix S2). Given the well-  
627 supported placement of these uncharacterized clades in our reconstruction, we find that the  
628 presence of *nifE* and *nifN* genes decreases stepwise with divergence age within the  
629 uncharacterized/V-/Fe-nitrogenase lineage: Mb-Mc taxa, most recently branched, have both  
630 *nifEN*, most F-Mc taxa only have *nifE*, and Clfx taxa, earliest branched, have neither. One may  
631 thus parsimoniously conclude that uncharacterized nitrogenase AncC–D ancestors similarly  
632 lacked the genetic requirements for FeMo-cofactor synthesis.

633



634 At least two possible models might resolve this discrepancy: (1) The last common nitrogenase  
635 ancestor represented in our tree was in fact hosted by an organism that possessed *nifEN* genes and  
636 was able to synthesize the FeMo-cofactor. However, this capability was lost in both Clfx and F-  
637 Mc taxa, but retained for all ancestors (AncA–E) as well as for Nif-I, Nif-II, and Mb-Mc taxa. The  
638 resemblance of oldest ancestral active sites (AncB–E) to those of Mo-nitrogenases indicate ancient  
639 FeMo-cofactor dependence, and the same resemblance of Clfx and F-Mc nitrogenases to Mo-  
640 nitrogenases may be inherited from these ancestors. (2) The last common nitrogenase ancestor was  
641 hosted by an organism that did not possess *nifEN* genes and was incapable of synthesizing the  
642 FeMo-cofactor. The presence of *nifEN* genes increased stepwise through the uncharacterized/V-  
643 /Fe-nitrogenase lineage, until the full FeMo-cofactor pathway was completed for AncB  
644 nitrogenase at the earliest, but at least in Mb-Mc nitrogenases (*nifEN* genes may have been  
645 transferred between ancestors of Mb-Mc, Nif-I, and Nif-II taxa). However, the resemblance of  
646 ancestral nitrogenase sequences to those of extant Mo-nitrogenases may evidence a currently  
647 unknown, alternative pathway for Mo-usage still present in extant Clfx and F-Mc taxa. This  
648 alternative, and possibly unrefined pathway for Mo-usage, may represent a transition state between  
649 ancient Mo-independence and full FeMo-cofactor usage.

650

651 We prefer the second model for several reasons:

652

653 (1) It is challenging to envision a scenario in which the FeMo-cofactor biosynthetic pathway would  
654 be lost in Clfx and F-Mc nitrogenases that appear to otherwise be capable of nitrogen fixation  
655 (Dekas et al., 2009; Keppen et al., 1989; Kuznetsov et al., 2011; Mehta & Baross, 2006). Mo-  
656 nitrogenases are far more efficient at reducing nitrogen than other isozymes (Eady, 1996; Harris

657 et al., 2019; Harris, Yang, et al., 2018), and the majority of all extant nitrogenases are Mo-  
658 dependent across both anoxic and oxic environments (Boyd et al., 2015; Mus, Colman, Peters, &  
659 Boyd, 2019; Raymond et al., 2004). Even those organisms that have additional V- or Fe-  
660 nitrogenases still retain and preferentially express Mo-nitrogenases (Boyd, Anbar, et al., 2011;  
661 Boyd, Hamilton, et al., 2011; Dos Santos et al., 2012; Hamilton et al., 2011; Raymond et al., 2004).  
662 Aside from Clfx and F-Mc clades, no other nitrogenases are known to lack associated *nifEN* genes.  
663  
664 (2) It has previously been proposed that early nitrogenases may have been capable of reducing  
665 nitrogen prior to the origin of *nifEN*, and thus of the FeMo-cofactor (Boyd, Hamilton, et al., 2011;  
666 Boyd & Peters, 2013; Mus et al., 2019; Soboh, Boyd, Zhao, Peters, & Rubio, 2010). Prior to the  
667 evolution of Mo-usage, an ancient Mo-independent nitrogenase may have been capable of —  
668 perhaps inefficiently — reducing nitrogen by a cofactor resembling the Fe-S-C cluster assembled  
669 by NifB, which constitutes the biosynthetic precursor to the FeMo-cofactor (Boyd & Peters, 2013;  
670 Mus et al., 2019; Soboh et al., 2010). Though our sequence analyses cannot assess ancestral  
671 nitrogenase dependence for a NifB-cofactor, it is likely that the NifB-cofactor resembles the  
672 structure and composition of the FeFe-cofactor, excepting homocitrate (Harris, Lukoyanov, et al.,  
673 2018). The greater similarity of AncC–D active sites to those of Mo-nitrogenases than Fe-  
674 nitrogenases likely suggests ancestral dependence on a cofactor incorporating Mo rather than only  
675 Fe. It is possible that, lacking NifEN, an alternative pathway for Mo-usage may have acted as a  
676 transition state between Mo-independence and full FeMo-cofactor usage. It is thus reasonable to  
677 speculate that this transition state of Mo-usage may be exhibited by AncC–D ancestors for which  
678 the lack of one or both *nifEN* genes might be parsimoniously inferred.  
679

680 (3) Given greater catalytic efficiency of Mo-nitrogenases, even an unrefined pathway for Mo-  
681 usage may have been of selective advantage if Mo was transiently available prior to ~2.3–2.5 Ga  
682 Earth surface oxygenation (Anbar et al., 2007; Anbar & Knoll, 2002; Canfield et al., 2010; Lyons  
683 et al., 2014; Raymond et al., 2004). An early generalist behavior with regard to metal usage has  
684 previously been proposed (Raymond et al., 2004); such limited and possibly non-specific Mo-  
685 usage early in nitrogenase history would have provided an evolutionary pathway for increased Mo-  
686 dependence via the addition of NifEN biosynthetic components.

687  
688 (4) ~3.2-Ga nitrogen isotopic signatures have been interpreted to reflect ancient Mo-dependent  
689 nitrogenase activity, due to similarities in isotopic fractionation by extant Mo-nitrogenases  
690 (Stueken et al., 2015). However, this interpretation conflicts with age estimates of both *nifEN* (and  
691 the FeMo-cofactor) (Boyd, Anbar, et al., 2011) and of earliest marine Mo availability (Anbar et  
692 al., 2007; Lyons et al., 2014). It is possible that alternative Mo-usage in early nitrogenases may  
693 have resulted in similar isotopic fractionations. Such possibilities may resolve this discrepancy and  
694 remain to be tested.

695  
696 The preferred model of an ancestral, alternative pathway for Mo-usage, mapped to our  
697 phylogenetic reconstruction and inferred ancestors, is illustrated in **Figure 7**. In the first stage,  
698 represented by AncD and extant Clfx nitrogenases, nitrogen fixation is achieved by a possible  
699 alternative pathway for Mo-usage in the absence of NifEN, incorporating an unknown “proto-  
700 cofactor” (**Figure 7a**). Such unrefined Mo-usage is of advantage during transient Mo availabilities  
701 prior to ~2.3–2.5 Ga Earth surface oxygenation (Anbar et al., 2007). In the second stage,  
702 represented by AncC and extant F-Mc nitrogenases, a gene duplication event forms NifE, though

703 potentially not sufficient for FeMo-cofactor synthesis (**Figure 7b**). Alternative Mo-usage may still  
704 be possible. In the third stage, represented by AncB, AncE, and extant Mb-Mc nitrogenases, a  
705 subsequent gene duplication event forms NifN (**Figure 7c**). Together, NifE and NifN are capable  
706 of synthesizing the FeMo-cofactor, resulting in canonical Mo-dependence. In the fourth stage,  
707 gene duplication of *nif* results in, first, *vnf*, followed by *anf* (**Figure 7d**). These V- and Fe-  
708 dependent enzymes rely on NifBEN biosynthetic components. Though the greater efficiency of  
709 Mo-nitrogenase results in widespread diversification, V- and Fe-nitrogenases provide selective  
710 advantage in microenvironments deficient in Mo. This model, built from the phylogenetic and  
711 ancestral sequence inferences provided here, as well as from decades of previous geobiological  
712 investigations of nitrogenase evolution, helps resolve outstanding questions regarding ancient  
713 metal dependence, and, importantly, provides testable hypotheses for future investigations. Such  
714 investigations may, for example, seek to clarify the nitrogen capability and metal dependence of  
715 uncharacterized Clfx and F-Mc nitrogenases, as well as experimentally resurrect and characterize  
716 ancestral nitrogenase sequences in the laboratory.

717

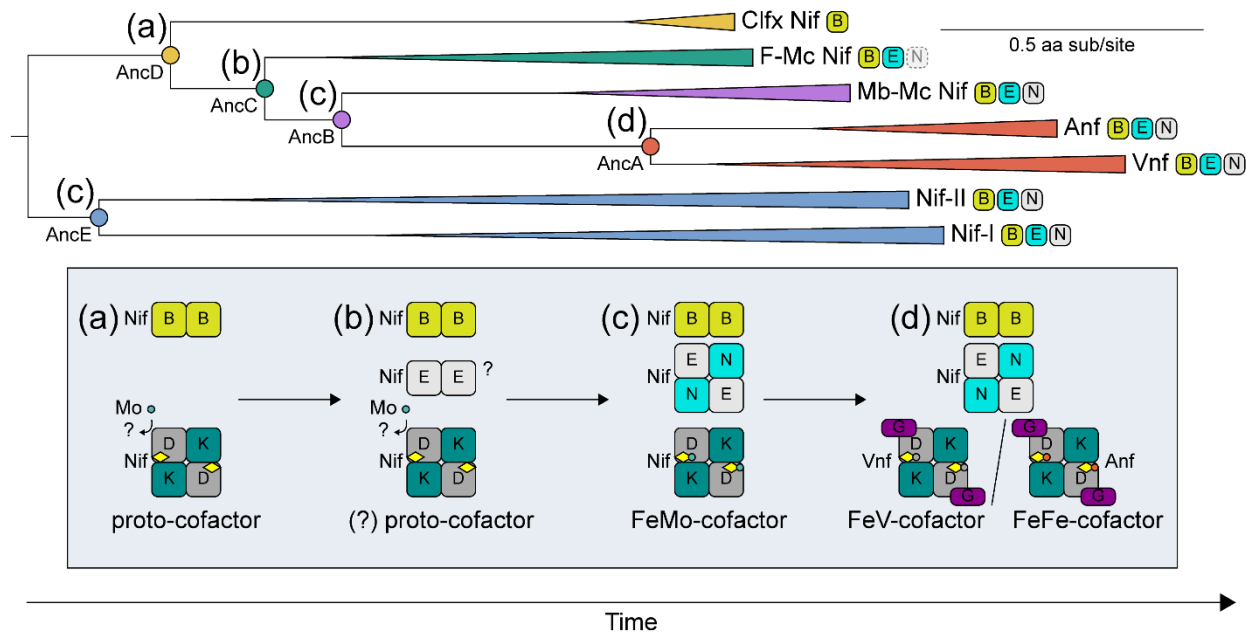

718

719 **Figure 7.** Proposed model for the evolution of nitrogenase metal specificity from an ancestral,  
 720 alternative pathway for Mo-usage. Full description of stages (a)–(d) in the evolution of nitrogenase  
 721 metal dependence is provided in the main text (Section 4.2). Possible alternative pathway for  
 722 nitrogenase Mo-usage indicated in stages (a)–(b). Phase (a)–(d) are also mapped to analyzed  
 723 ancestors within the nitrogenase phylogeny. Presence of NifB, NifE, and NifN in represented taxa  
 724 indicated next to each clade of the phylogeny (F-Mc clade has only one species that harbors NifN).  
 725

### 726 4.3 Potential association of early nitrogen fixation with phototrophic metabolism

727 The relatively early-branching position of Clfx nitrogenases, hosted by strains in class Chloroflexi  
 728 (green non-sulfur bacteria), suggests that biological nitrogen fixation may have had early  
 729 associations with anoxygenic phototrophy. It has previously been proposed that biological nitrogen  
 730 fixation originated in hydrogenotrophic methanogens due to the basal positioning of Mb-Mc  
 731 (Methanobacteria and Methanococcus) or F-Mc (Firmicutes and Methanococcus) sequences in  
 732 phylogenetic analyses of catalytic (i.e., NifHDK) and biosynthetic (i.e., NifBEN) nitrogenase

733 sequences (Boyd, Anbar, et al., 2011; Boyd, Hamilton, et al., 2011; Boyd & Peters, 2013;  
734 Raymond et al., 2004). By contrast, in our phylogenetic reconstruction, Clfx NifHDK sequences  
735 diverge earlier than both F-Mc and Mb-Mc sequences, with at least one represented strain having  
736 been observed to fix nitrogen (Keppen et al., 1989; Kuznetsov et al., 2011). An early association  
737 of biological nitrogen fixation with anoxygenic phototrophy would not be unexpected given the  
738 well-studied homology between nitrogenases and dark-operative protochlorophyllide  
739 oxidoreductases (Bch/ChlLNB), enzymes that catalyze part of the bacteriochlorophyll biosynthetic  
740 pathway (Y. Hu & Ribbe, 2015; Moser & Brocker, 2011; Raymond et al., 2004). Furthermore,  
741 Chloroflexi strains that possess uncharacterized Clfx nitrogenases also harbor BchLNB genes.  
742 Though the phylogeny presented here may still be consistent with the origin of the full FeMo-  
743 cofactor biosynthetic pathway (NifHDKBEN) in early methanogens (Boyd, Anbar, et al., 2011;  
744 Boyd, Hamilton, et al., 2011; Boyd & Peters, 2013; Raymond et al., 2004), the basal position of  
745 Clfx sequences may evidence an earlier metabolic context for biological nitrogen fixation prior to  
746 the origin of the FeMo-cofactor. Future investigations of nitrogen fixation by other phototrophic  
747 Chloroflexi strains and additional taxa that harbor basal uncharacterized nitrogenases may resolve  
748 these aspects of nitrogenase origins.

749

## 750 **CONCLUSION**

751 We reconstructed the phylogenetic history of nitrogenase proteins, as well as inferred ancestral  
752 nitrogenase sequences, in order to explore the evolutionary trajectory of nitrogenase metal  
753 dependence. We find that, whereas modeled structural features of ancestral nitrogenases do not  
754 offer conclusive indications of ancient metal usage, active-site sequence features of ancestors most  
755 resemble those of extant Mo-nitrogenases. The absence of associated cofactor biosynthesis

756 proteins, considered necessary for FeMo-cofactor assembly, in several early-branching  
757 uncharacterized nitrogenase lineages evidences a possible alternative pathway for Mo-usage. We  
758 speculate that this alternative pathway may have preceded the evolution of the FeMo-cofactor and  
759 may today be present in extant uncharacterized nitrogenases, and we propose a model wherein  
760 canonical Mo-usage evolved via the stepwise introduction of FeMo-cofactor biosynthetic  
761 components following the divergence of more basal uncharacterized lineages. V-nitrogenases  
762 subsequently diversified, followed by Fe-nitrogenases, in agreement with previous phylogenetic  
763 inferences that Mo-dependence evolved first(Boyd, Hamilton, et al., 2011). This model helps to  
764 reconcile phylogenetic and geobiological explanations of nitrogenase evolution(Anbar & Knoll,  
765 2002; Boyd, Anbar, et al., 2011; Boyd, Hamilton, et al., 2011). Future studies, particularly those  
766 that integrate experimental assessments of laboratory-resurrected ancestral nitrogenases, may  
767 continue to refine our understanding of nitrogenase and environmental coevolution.

768

## 769 **ACKNOWLEDGEMENTS**

770 This work was supported by a NASA Astrobiology Postdoctoral Fellowship (Garcia), the Harvard  
771 Origins of Life Initiative (Kacar, McShea), the National Science Foundation (Kacar, #1724090)  
772 and the John Templeton Foundation (Kacar, #58562 and #61239). We thank Andrew Knoll for  
773 constructive feedback.

## REFERENCES

- Aadland, K., Pugh, C., & Kolaczowski, B. (2019). High-Throughput Reconstruction of Ancestral Protein Sequence, Structure, and Molecular Function. *Methods Mol Biol*, 1851, 135-170. doi:10.1007/978-1-4939-8736-8\_8
- Allen, R. M., Chatterjee, R., Ludden, P. W., & Shah, V. K. (1995). Incorporation of iron and sulfur from NifB cofactor into the iron-molybdenum cofactor of dinitrogenase. *J Biol Chem*, 270(45), 26890-26896. doi:10.1074/jbc.270.45.26890
- Anbar, A. D., Duan, Y., Lyons, T. W., Arnold, G. L., Kendall, B., Creaser, R. A., . . . Buick, R. (2007). A whiff of oxygen before the great oxidation event? *Science*, 317(5846), 1903-1906. doi:10.1126/science.1140325
- Anbar, A. D., & Knoll, A. H. (2002). Proterozoic ocean chemistry and evolution: a bioinorganic bridge? *Science*, 297(5584), 1137-1142. doi:10.1126/science.1069651
- Anisimova, M., & Gascuel, O. (2006). Approximate likelihood-ratio test for branches: A fast, accurate, and powerful alternative. *Syst Biol*, 55(4), 539-552. doi:10.1080/10635150600755453
- Benner, S. A., Sassi, S. O., & Gaucher, E. A. (2007). Molecular paleoscience: systems biology from the past. *Adv Enzymol Relat Areas Mol Biol*, 75, 1-132, xi.
- Berman, H. M., Westbrook, J., Feng, Z., Gilliland, G., Bhat, T. N., Weissig, H., . . . Bourne, P. E. (2000). The Protein Data Bank. *Nucleic Acids Res*, 28(1), 235-242.
- Boyd, E. S., Anbar, A. D., Miller, S., Hamilton, T. L., Lavin, M., & Peters, J. W. (2011). A late methanogen origin for molybdenum-dependent nitrogenase. *Geobiology*, 9(3), 221-232. doi:10.1111/j.1472-4669.2011.00278.x
- Boyd, E. S., Costas, A. M., Hamilton, T. L., Mus, F., & Peters, J. W. (2015). Evolution of molybdenum nitrogenase during the transition from anaerobic to aerobic metabolism. *J Bacteriol*, 197(9), 1690-1699. doi:10.1128/JB.02611-14
- Boyd, E. S., Hamilton, T. L., & Peters, J. W. (2011). An alternative path for the evolution of biological nitrogen fixation. *Front Microbiol*, 2, 205. doi:10.3389/fmicb.2011.00205
- Boyd, E. S., & Peters, J. W. (2013). New insights into the evolutionary history of biological nitrogen fixation. *Front Microbiol*, 4, 201. doi:10.3389/fmicb.2013.00201
- Brigle, K. E., Setterquist, R. A., Dean, D. R., Cantwell, J. S., Weiss, M. C., & Newton, W. E. (1987). Site-directed mutagenesis of the nitrogenase MoFe protein of *Azotobacter vinelandii*. *Proc Natl Acad Sci U S A*, 84(20), 7066-7069.
- Bulen, W. A., & LeCompte, J. R. (1966). The nitrogenase system from *Azotobacter*: two-enzyme requirement for N<sub>2</sub> reduction, ATP-dependent H<sub>2</sub> evolution, and ATP hydrolysis. *Proc Natl Acad Sci U S A*, 56(3), 979-986. doi:10.1073/pnas.56.3.979
- Camacho, C., Coulouris, G., Avagyan, V., Ma, N., Papadopoulos, J., Bealer, K., & Madden, T. L. (2009). BLAST+: architecture and applications. *BMC Bioinformatics*, 10, 421. doi:10.1186/1471-2105-10-421
- Canfield, D. E., Glazer, A. N., & Falkowski, P. G. (2010). The evolution and future of Earth's nitrogen cycle. *Science*, 330(6001), 192-196. doi:10.1126/science.1186120
- Chen, I. A., Chu, K., Palaniappan, K., Pillay, M., Ratner, A., Huang, J., . . . Kyrpides, N. C. (2019). IMG/M v.5.0: an integrated data management and comparative analysis system for microbial genomes and microbiomes. *Nucleic Acids Res*, 47(D1), D666-D677. doi:10.1093/nar/gky901



- Christiansen, J., Cash, V. L., Seefeldt, L. C., & Dean, D. R. (2000). Isolation and characterization of an acetylene-resistant nitrogenase. *J Biol Chem*, 275(15), 11459-11464.
- Curatti, L., Hernandez, J. A., Igarashi, R. Y., Soboh, B., Zhao, D., & Rubio, L. M. (2007). In vitro synthesis of the iron-molybdenum cofactor of nitrogenase from iron, sulfur, molybdenum, and homocitrate using purified proteins. *Proc Natl Acad Sci U S A*, 104(45), 17626-17631. doi:10.1073/pnas.0703050104
- Dekas, A. E., Poretsky, R. S., & Orphan, V. J. (2009). Deep-sea archaea fix and share nitrogen in methane-consuming microbial consortia. *Science*, 326(5951), 422-426. doi:10.1126/science.1178223
- Dos Santos, P. C., Fang, Z., Mason, S. W., Setubal, J. C., & Dixon, R. (2012). Distribution of nitrogen fixation and nitrogenase-like sequences amongst microbial genomes. *BMC Genomics*, 13, 162. doi:10.1186/1471-2164-13-162
- Durrant, J. D., Votapka, L., Sorensen, J., & Amaro, R. E. (2014). POVME 2.0: An Enhanced Tool for Determining Pocket Shape and Volume Characteristics. *J Chem Theory Comput*, 10(11), 5047-5056. doi:10.1021/ct500381c
- Eady, R. R. (1996). Structure-function relationships of alternative nitrogenases. *Chemical Reviews*, 96(7), 3013-3030. doi:10.1021/cr950057h
- Edgar, R. C. (2004). MUSCLE: multiple sequence alignment with high accuracy and high throughput. *Nucleic Acids Res*, 32(5), 1792-1797. doi:10.1093/nar/gkh340
- Falkowski, P. G. (1997). Evolution of the nitrogen cycle and its influence on the biological sequestration of CO<sub>2</sub> in the ocean. *Nature*, 387(6630), 272-275. doi:10.1038/387272a0
- Fixen, K. R., Zheng, Y., Harris, D. F., Shaw, S., Yang, Z. Y., Dean, D. R., . . . Harwood, C. S. (2016). Light-driven carbon dioxide reduction to methane by nitrogenase in a photosynthetic bacterium. *Proc Natl Acad Sci U S A*, 113(36), 10163-10167. doi:10.1073/pnas.1611043113
- Garcia, A. K., & Kacar, B. (2019). How to resurrect ancestral proteins as proxies for ancient biogeochemistry. *Free Radic Biol Med*. doi:10.1016/j.freeradbiomed.2019.03.033
- Gomez-Fernandez, B. J., Garcia-Ruiz, E., Martin-Diaz, J., Gomez de Santos, P., Santos-Moriano, P., Plou, F. J., . . . Alcalde, M. (2018). Directed -in vitro- evolution of Precambrian and extant Rubiscos. *Sci Rep*, 8(1), 5532. doi:10.1038/s41598-018-23869-3
- Hageman, R. V., & Burris, R. H. (1978). Nitrogenase and nitrogenase reductase associate and dissociate with each catalytic cycle. *Proc Natl Acad Sci U S A*, 75(6), 2699-2702. doi:10.1073/pnas.75.6.2699
- Hales, B. J., Case, E. E., Morningstar, J. E., Dzeda, M. F., & Mauterer, L. A. (1986). Isolation of a new vanadium-containing nitrogenase from *Azotobacter vinelandii*. *Biochemistry*, 25(23), 7251-7255. doi:10.1021/bi00371a001
- Hamilton, T. L., Ludwig, M., Dixon, R., Boyd, E. S., Dos Santos, P. C., Setubal, J. C., . . . Peters, J. W. (2011). Transcriptional profiling of nitrogen fixation in *Azotobacter vinelandii*. *J Bacteriol*, 193(17), 4477-4486. doi:10.1128/JB.05099-11
- Hanson-Smith, V., & Johnson, A. (2016). PhyloBot: A Web Portal for Automated Phylogenetics, Ancestral Sequence Reconstruction, and Exploration of Mutational Trajectories. *PLoS Comput Biol*, 12(7), e1004976. doi:10.1371/journal.pcbi.1004976
- Hanson-Smith, V., Kolaczkowski, B., & Thornton, J. W. (2010). Robustness of ancestral sequence reconstruction to phylogenetic uncertainty. *Mol Biol Evol*, 27(9), 1988-1999. doi:10.1093/molbev/msq081

- Harris, D. F., Lukoyanov, D., Kallas, H., Trncik, C., Yang, Z., Compton, P., . . . Seefeldt, L. C. (2019). Mo-, V-, and Fe-nitrogenases use a universal eight-electron reductive-elimination mechanism to achieve N<sub>2</sub> reduction. *Biochemistry*.
- Harris, D. F., Lukoyanov, D. A., Shaw, S., Compton, P., Tokmina-Lukaszewska, M., Bothner, B., . . . Seefeldt, L. C. (2018). Mechanism of N<sub>2</sub> Reduction Catalyzed by Fe-Nitrogenase Involves Reductive Elimination of H<sub>2</sub>. *Biochemistry*, 57(5), 701-710. doi:10.1021/acs.biochem.7b01142
- Harris, D. F., Yang, Z. Y., Dean, D. R., Seefeldt, L. C., & Hoffman, B. M. (2018). Kinetic Understanding of N<sub>2</sub> Reduction versus H<sub>2</sub> Evolution at the E<sub>4</sub>(4H) Janus State in the Three Nitrogenases. *Biochemistry*, 57(39), 5706-5714. doi:10.1021/acs.biochem.8b00784
- Hoffman, B. M., Lukoyanov, D., Yang, Z. Y., Dean, D. R., & Seefeldt, L. C. (2014). Mechanism of nitrogen fixation by nitrogenase: the next stage. *Chem Rev*, 114(8), 4041-4062. doi:10.1021/cr400641x
- Hu, B., Harris, D. F., Dean, D. R., Liu, T. L., Yang, Z. Y., & Seefeldt, L. C. (2018). Electrocatalytic CO<sub>2</sub> reduction catalyzed by nitrogenase MoFe and FeFe proteins. *Bioelectrochemistry*, 120, 104-109. doi:10.1016/j.bioelechem.2017.12.002
- Hu, Y., Lee, C. C., & Ribbe, M. W. (2011). Extending the Carbon Chain: Hydrocarbon Formation Catalyzed by Vanadium/Molybdenum Nitrogenases. *Science*, 333(6043), 753-755. doi:10.1126/science.1206883
- Hu, Y., & Ribbe, M. W. (2011). Biosynthesis of Nitrogenase FeMoco. *Coord Chem Rev*, 255(9-10), 1218-1224. doi:10.1016/j.ccr.2010.11.018
- Hu, Y., & Ribbe, M. W. (2015). Nitrogenase and homologs. *J Biol Inorg Chem*, 20(2), 435-445. doi:10.1007/s00775-014-1225-3
- Joerger, R. D., & Bishop, P. E. (1988). Bacterial alternative nitrogen fixation systems. *Crit Rev Microbiol*, 16(1), 1-14. doi:10.3109/10408418809104465
- Kacar, B., Hanson-Smith, V., Adam, Z. R., & Boekelheide, N. (2017). Constraining the timing of the Great Oxidation Event within the Rubisco phylogenetic tree. *Geobiology*, 15(5), 628-640. doi:10.1111/gbi.12243
- Kennedy, C., & Dean, D. (1992). The nifU, nifS and nifV gene products are required for activity of all three nitrogenases of *Azotobacter vinelandii*. *Mol Gen Genet*, 231(3), 494-498.
- Keppen, O. I., Lebedeva, N. V., Troshina, O. Y., & Rodionov, Y. V. (1989). The nitrogenase activity of filamentous phototrophic green bacterium. *Mikrobiologiya*, 58, 520-521.
- Kim, C. H., Newton, W. E., & Dean, D. R. (1995). Role of the MoFe protein alpha-subunit histidine-195 residue in FeMo-cofactor binding and nitrogenase catalysis. *Biochemistry*, 34(9), 2798-2808.
- Krahn, E., Weiss, R., Krockel, M., Groppe, J., Henkel, G., Cramer, P., . . . Muller, A. (2002). The Fe-only nitrogenase from *Rhodobacter capsulatus*: identification of the cofactor, an unusual, high-nuclearity iron-sulfur cluster, by Fe K-edge EXAFS and 57Fe Mossbauer spectroscopy. *J Biol Inorg Chem*, 7(1-2), 37-45. doi:10.1007/s007750100263
- Kuznetsov, B. B., Ivanovsky, R. N., Keppen, O. I., Sukhacheva, M. V., Bumazhkin, B. K., Patutina, E. O., . . . Skryabin, K. G. (2011). Draft genome sequence of the anoxygenic filamentous phototrophic bacterium *Oscillochloris trichoides* subsp. DG-6. *J Bacteriol*, 193(1), 321-322. doi:10.1128/JB.00931-10
- Le, S. Q., & Gascuel, O. (2008). An improved general amino acid replacement matrix. *Mol Biol Evol*, 25(7), 1307-1320. doi:10.1093/molbev/msn067

- Lee, C. C., Tanifuji, K., Newcomb, M., Liedtke, J., Hu, Y., & Ribbe, M. W. (2018). A Comparative Analysis of the CO-Reducing Activities of MoFe Proteins Containing Mo- and V-Nitrogenase Cofactors. *Chembiochem*, 19(7), 649-653. doi:10.1002/cbic.201800035
- Liu, Y., Schmidt, B., & Maskell, D. L. (2010). MSAProbs: multiple sequence alignment based on pair hidden Markov models and partition function posterior probabilities. *Bioinformatics*, 26(16), 1958-1964. doi:10.1093/bioinformatics/btq338
- Lyons, T. W., Reinhard, C. T., & Planavsky, N. J. (2014). The rise of oxygen in Earth's early ocean and atmosphere. *Nature*, 506(7488), 307-315. doi:10.1038/nature13068
- MacKay, B. A., & Fryzuk, M. D. (2004). Dinitrogen coordination chemistry: on the biomimetic borderlands. *Chem Rev*, 104(2), 385-401. doi:10.1021/cr020610c
- McGlynn, S. E., Boyd, E. S., Peters, J. W., & Orphan, V. J. (2012). Classifying the metal dependence of uncharacterized nitrogenases. *Front Microbiol*, 3, 419. doi:10.3389/fmicb.2012.00419
- McRose, D. L., Zhang, X., Kraepiel, A. M., & Morel, F. M. (2017). Diversity and Activity of Alternative Nitrogenases in Sequenced Genomes and Coastal Environments. *Front Microbiol*, 8, 267. doi:10.3389/fmicb.2017.00267
- Mehta, M. P., & Baross, J. A. (2006). Nitrogen fixation at 92 degrees C by a hydrothermal vent archaeon. *Science*, 314(5806), 1783-1786. doi:10.1126/science.1134772
- Moore, E. K., Jelen, B. I., Giovannelli, D., Raanan, H., & Falkowski, P. G. (2017). Metal availability and the expanding network of microbial metabolisms in the Archaean eon. *Nature Geoscience*, 10(9), 629-636. doi:10.1038/ngeo3006
- Moser, J., & Brocker, M. J. (2011). Enzymatic Systems with Homology to Nitrogenase. *Nitrogen Fixation: Methods and Protocols*, 766, 67-77. doi:10.1007/978-1-61779-194-9\_5
- Mus, F., Alleman, A. B., Pence, N., Seefeldt, L. C., & Peters, J. W. (2018). Exploring the alternatives of biological nitrogen fixation. *Metallomics*, 10(4), 523-538. doi:10.1039/c8mt00038g
- Mus, F., Colman, D. R., Peters, J. W., & Boyd, E. S. (2019). Geobiological feedbacks, oxygen, and the evolution of nitrogenase. *Free Radic Biol Med*. doi:10.1016/j.freeradbiomed.2019.01.050
- O'Leary, N. A., Wright, M. W., Brister, J. R., Ciufu, S., Haddad, D., McVeigh, R., . . . Pruitt, K. D. (2016). Reference sequence (RefSeq) database at NCBI: current status, taxonomic expansion, and functional annotation. *Nucleic Acids Res*, 44(D1), D733-745. doi:10.1093/nar/gkv1189
- Ormeño-Orrillo, E., Hungria, M., & Martinez-Romero, E. (2013). Dinitrogen-Fixing Prokaryotes. In *The Prokaryotes* (pp. 427-451).
- Quang, L. S., Gascuel, O., & Lartillot, N. (2008). Empirical profile mixture models for phylogenetic reconstruction. *Bioinformatics*, 24(20), 2317-2323. doi:10.1093/bioinformatics/btn445
- R Core Team. (2014). *R: A language and environment for statistical computing*. Vienna, Austria: R Foundation for Statistical Computing.
- Raymond, J., Siefert, J. L., Staples, C. R., & Blankenship, R. E. (2004). The natural history of nitrogen fixation. *Mol Biol Evol*, 21(3), 541-554. doi:10.1093/molbev/msh047
- Rebelein, J. G., Lee, C. C., Newcomb, M., Hu, Y., & Ribbe, M. W. (2018). Characterization of an M-Cluster-Substituted Nitrogenase VFe Protein. *MBio*, 9(2). doi:10.1128/mBio.00310-18

- Roll, J. T., Shah, V. K., Dean, D. R., & Roberts, G. P. (1995). Characteristics of NIFNE in *Azotobacter vinelandii* strains. Implications for the synthesis of the iron-molybdenum cofactor of dinitrogenase. *J Biol Chem*, *270*(9), 4432-4437. doi:10.1074/jbc.270.9.4432
- Rubio, L. M., & Ludden, P. W. (2008). Biosynthesis of the iron-molybdenum cofactor of nitrogenase. *Annu Rev Microbiol*, *62*, 93-111. doi:10.1146/annurev.micro.62.081307.162737
- Sali, A., & Blundell, T. L. (1993). Comparative protein modelling by satisfaction of spatial restraints. *J Mol Biol*, *234*(3), 779-815. doi:10.1006/jmbi.1993.1626
- Sarma, R., Barney, B. M., Keable, S., Dean, D. R., Seefeldt, L. C., & Peters, J. W. (2010). Insights into substrate binding at FeMo-cofactor in nitrogenase from the structure of an alpha-70(Ile) MoFe protein variant. *J Inorg Biochem*, *104*(4), 385-389. doi:10.1016/j.jinorgbio.2009.11.009
- Schmid, B., Einsle, O., Chiu, H. J., Willing, A., Yoshida, M., Howard, J. B., & Rees, D. C. (2002). Biochemical and structural characterization of the cross-linked complex of nitrogenase: comparison to the ADP-AlF<sub>4</sub>(-)-stabilized structure. *Biochemistry*, *41*(52), 15557-15565.
- Setubal, J. C., dos Santos, P., Goldman, B. S., Ertesvag, H., Espin, G., Rubio, L. M., . . . Wood, D. (2009). Genome sequence of *Azotobacter vinelandii*, an obligate aerobe specialized to support diverse anaerobic metabolic processes. *J Bacteriol*, *191*(14), 4534-4545. doi:10.1128/JB.00504-09
- Shah, V. K., Allen, J. R., Spangler, N. J., & Ludden, P. W. (1994). In vitro synthesis of the iron-molybdenum cofactor of nitrogenase. Purification and characterization of NifB cofactor, the product of NIFB protein. *J Biol Chem*, *269*(2), 1154-1158.
- Shah, V. K., Imperial, J., Ugalde, R. A., Ludden, P. W., & Brill, W. J. (1986). In vitro synthesis of the iron-molybdenum cofactor of nitrogenase. *Proc Natl Acad Sci U S A*, *83*(6), 1636-1640. doi:10.1073/pnas.83.6.1636
- Shih, P. M., Occhialini, A., Cameron, J. C., Andralojc, P. J., Parry, M. A., & Kerfeld, C. A. (2016). Biochemical characterization of predicted Precambrian RuBisCO. *Nat Commun*, *7*, 10382. doi:10.1038/ncomms10382
- Sippel, D., & Einsle, O. (2017). The structure of vanadium nitrogenase reveals an unusual bridging ligand. *Nat Chem Biol*, *13*(9), 956-960. doi:10.1038/nchembio.2428
- Sippel, D., Rohde, M., Netzer, J., Trncik, C., Gies, J., Grunau, K., . . . Einsle, O. (2018). A bound reaction intermediate sheds light on the mechanism of nitrogenase. *Science*, *359*(6383), 1484-1489. doi:10.1126/science.aar2765
- Soboh, B., Boyd, E. S., Zhao, D., Peters, J. W., & Rubio, L. M. (2010). Substrate specificity and evolutionary implications of a NifDK enzyme carrying NifB-co at its active site. *FEBS Lett*, *584*(8), 1487-1492. doi:10.1016/j.febslet.2010.02.064
- Spatzal, T., Aksoyoglu, M., Zhang, L., Andrade, S. L., Schleicher, E., Weber, S., . . . Einsle, O. (2011). Evidence for interstitial carbon in nitrogenase FeMo cofactor. *Science*, *334*(6058), 940. doi:10.1126/science.1214025
- St John, R. T., Johnston, H. M., Seidman, C., Garfinkel, D., Gordon, J. K., Shah, V. K., & Brill, W. J. (1975). Biochemistry and genetics of *Klebsiella pneumoniae* mutant strains unable to fix N<sub>2</sub>. *J Bacteriol*, *121*(3), 759-765.
- Stamatakis, A. (2014). RAxML version 8: a tool for phylogenetic analysis and post-analysis of large phylogenies. *Bioinformatics*, *30*(9), 1312-1313. doi:10.1093/bioinformatics/btu033

- Stueken, E. E., Buick, R., Guy, B. M., & Koehler, M. C. (2015). Isotopic evidence for biological nitrogen fixation by molybdenum-nitrogenase from 3.2 Gyr. *Nature*, *520*(7549), 666-669. doi:10.1038/nature14180
- Tal, S., Chun, T. W., Gavini, N., & Burgess, B. K. (1991). The delta nifB (or delta nifE) FeMo cofactor-deficient MoFe protein is different from the delta nifH protein. *J Biol Chem*, *266*(16), 10654-10657.
- Thornton, J. W. (2004). Resurrecting ancient genes: experimental analysis of extinct molecules. *Nat Rev Genet*, *5*(5), 366-375. doi:10.1038/nrg1324
- Whelan, S., & Goldman, N. (2001). A general empirical model of protein evolution derived from multiple protein families using a maximum-likelihood approach. *Mol Biol Evol*, *18*(5), 691-699. doi:10.1093/oxfordjournals.molbev.a003851
- Yang, Z. (1993). Maximum-likelihood estimation of phylogeny from DNA sequences when substitution rates differ over sites. *Mol Biol Evol*, *10*(6), 1396-1401. doi:10.1093/oxfordjournals.molbev.a040082
- Yang, Z. (2007). PAML 4: phylogenetic analysis by maximum likelihood. *Mol Biol Evol*, *24*(8), 1586-1591. doi:10.1093/molbev/msm088
- Yang, Z. Y., Moure, V. R., Dean, D. R., & Seefeldt, L. C. (2012). Carbon dioxide reduction to methane and coupling with acetylene to form propylene catalyzed by remodeled nitrogenase. *Proc Natl Acad Sci U S A*, *109*(48), 19644-19648. doi:10.1073/pnas.1213159109
- Zhang, X., McRose, D. L., Darnajoux, R., Bellenger, J. P., Morel, F. M. M., & Kraepiel, A. M. L. (2016). Alternative nitrogenase activity in the environment and nitrogen cycle implications. *Biogeochemistry*, *127*(2-3), 189-198. doi:10.1007/s10533-016-0188-6
- Zheng, Y., Harris, D. F., Yu, Z., Fu, Y., Poudel, S., Ledbetter, R. N., . . . Harwood, C. S. (2018). A pathway for biological methane production using bacterial iron-only nitrogenase. *Nat Microbiol*, *3*(3), 281-286. doi:10.1038/s41564-017-0091-5
